# Supplementary material for: Observation of robust intrinsic C points in self-biased gyromagnetic photonic crystals
Source: Research Square preprint supplement (doi:10.21203/rs.3.rs-8773581/v1), 2026-02-12
Supplement: Supplementary file 1 [file 9ffd24f3874326971a507554.docx]

Supplemental Information for

**Observation of robust intrinsic C points in self-biased gyromagnetic photonic crystals**

Maohua Gong1, #,Chunquan Peng2, #, Qiutong Zhen2, Peng Hu3, Qingan Tu1, Perry Ping Shum1, Peiheng Zhou2,*, Zhen Gao1,†

1State Key Laboratory of Optical Fiber and Cable Manufacturing Technology, Department of Electronic and Electrical Engineering, Guangdong Key Laboratory of Integrated Optoelectronics Intellisense, Southern University of Science and Technology, Shenzhen 518055, China

2National Engineering Research Center of Electromagnetic Radiation Control Materials, Key Laboratory of Multi-spectral Absorbing Materials and Structures of Ministry of Education, University of Electronic Science and Technology of China, Chengdu, China

3School of Science, Chongqing University of Technology, Chongqing, 400054 China

#These authors contributed equally to this work

†*corresponding author: [gaoz@sustech.edu.cn](mailto:gaoz@sustech.edu.cn); phzhou@uestc.edu.cn

**Supplementary Note 1: Magnetic permeability tensor of La:BaFe12O19 (La:BaM)**

**Supplementary Note 2: Group theory-based analysis of mode symmetry**

**Supplementary Note 3: The analysis of the two-level MO coupled Hamiltonian**

**Supplementary Note 4: Tune the chirality of the robust intrinsic C points by reversing the magnetization direction**

**Supplementary Note 5: Methods to obtain far-field polarization states and Stokes parameters**

**Supplementary Note 6: Robust intrinsic C points with high-Q at the Γ point**

**Supplementary Note 7: Experimental setup for characterizing the transmission and CD spectra**

**Supplementary Note 8: Generation of robust intrinsic C points at higher frequency**

**Supplementary Note 9: Finite-element-method analysis of photonic chiral flat surfaces**

**Supplementary Note 10: Near-field analysis of photonic chiral flat surfaces**

**Supplementary Note 11: Switching the chirality of photonic chiral flat surfaces**

**Supplementary References**

**Supplementary Note 1: Magnetic permeability tensor of La:BaFe12O19 (La:BaM)**

Fig. S1 presents the experimentally measured data of the permeability tensor elements of La:BaM, with the corresponding theoretical model detailed in Ref. [1].

**
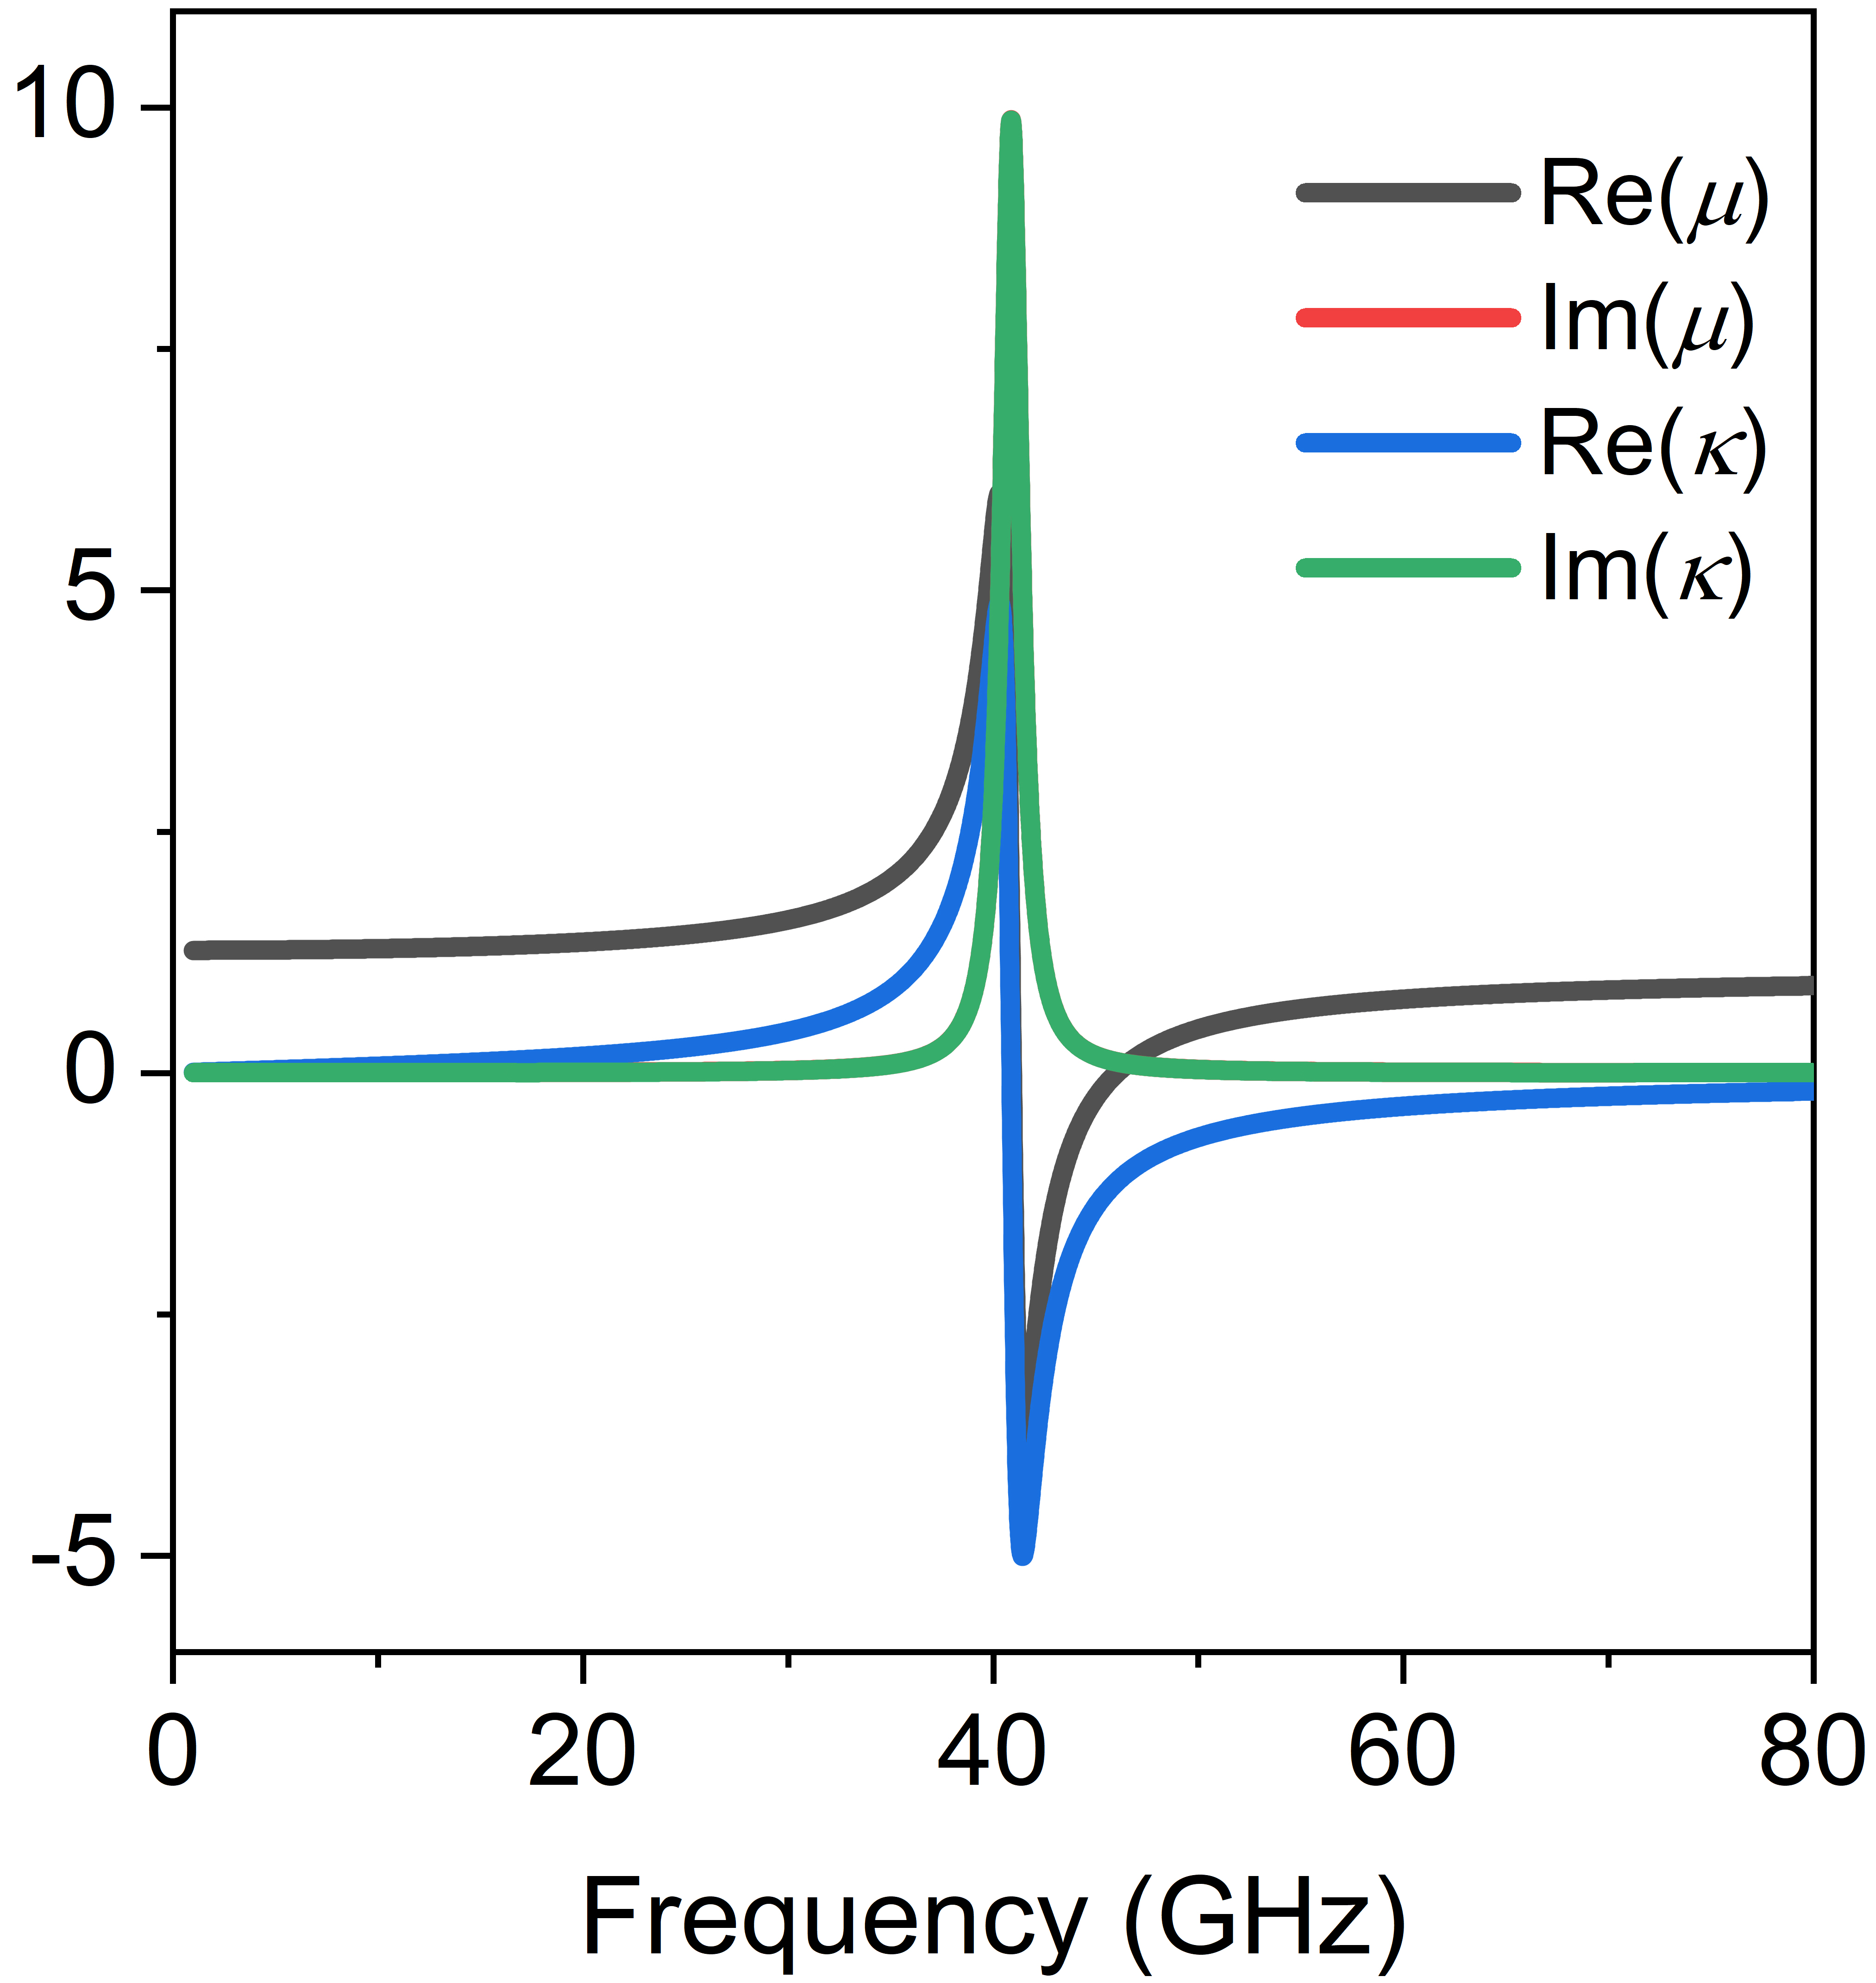
**

**Fig. S1** **|** **The permeability tensor elements of La:BaM.** Experimentally measured permeability tensor elements of La:BaM at the remanence state. The black, red, blue, and green lines represent the real and imaginary parts of μ and κ, respectively.

**Supplementary Note 2: Group theory-based analysis of mode symmetry**

In a *C*4v​ symmetric photonic crystal slab (PhCs) with time-reversal symmetry (Mr = 0), the E2 representation is a two-dimensional (2D) irreducible representation corresponding to doubly degenerate eigenmodes that can radiate into free space, as shown in the upper row of Fig. S2. Specifically, E2​ decomposes into two one-dimensional (1D) irreducible representations, E2a and E2b​, whose degeneracy is protected by the time-reversal symmetry (TRS) [2-3]. However, when the TRS is broken (e.g., by introducing magneto-optical (MO) couplings with Mr 0*​*), this degeneracy will be lifted and result in two non-degenerate modes associated with E2a​ and E2b, as shown in the lower row of Fig. S2 [2]. The character table for these representations is provided in Table S1. When Mr ≠ 0, the symmetries of the two single states (E2a and E2b​) remain consistent with the plane waves. For example, a *z*-propagating plane wave is odd under a 180° rotation (*C*2) about the *z*-axis. Similarly, modes belonging to the E2a​ and E2b representations (lower row of Fig. S2) also exhibit odd symmetry under *C*2z (Table S1). Thus, the two single modes can radiate to the far field while possessing finite quality factors.

**
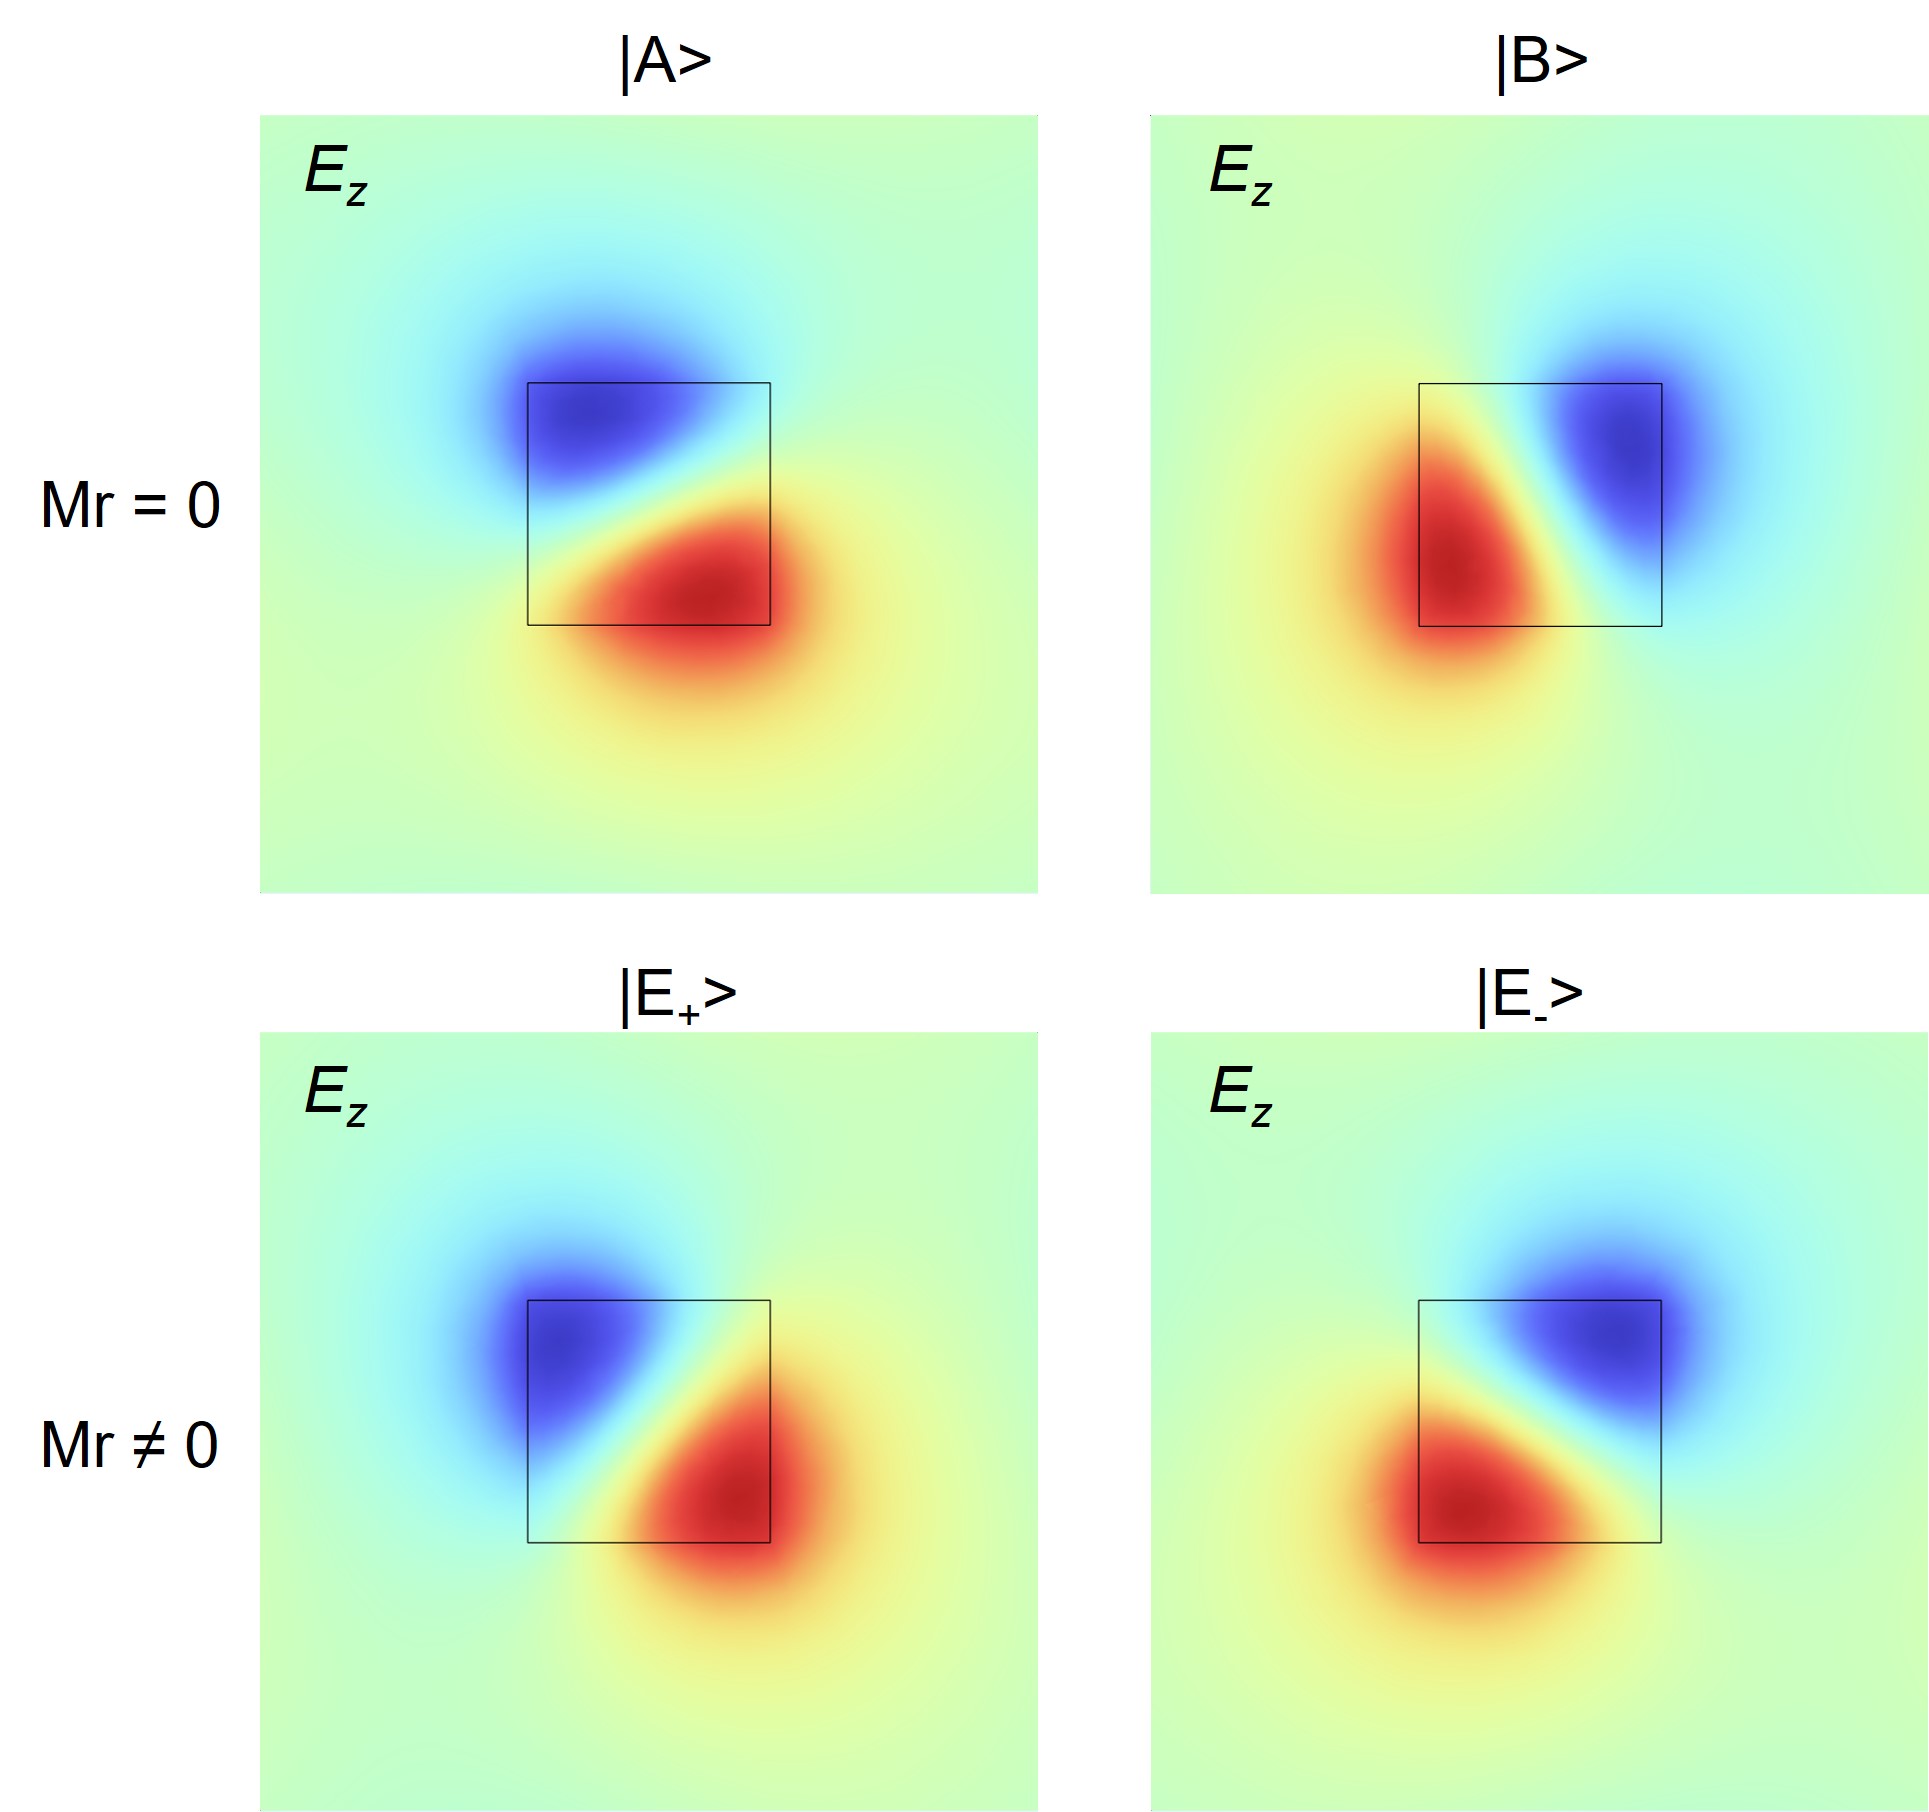
**

**Fig. S2 | Group theory-based analysis of mode symmetry.** Upper row: when Mr = 0, the *Ez* field distributions of the degenerate modes are odd symmetry under *C*2 rotation about the *z*-axis. Lower row: when Mr ≠ 0, the *Ez* field distributions of |E±> also exhibit odd symmetry under *C*2z rotation about the *z*-axis.

**
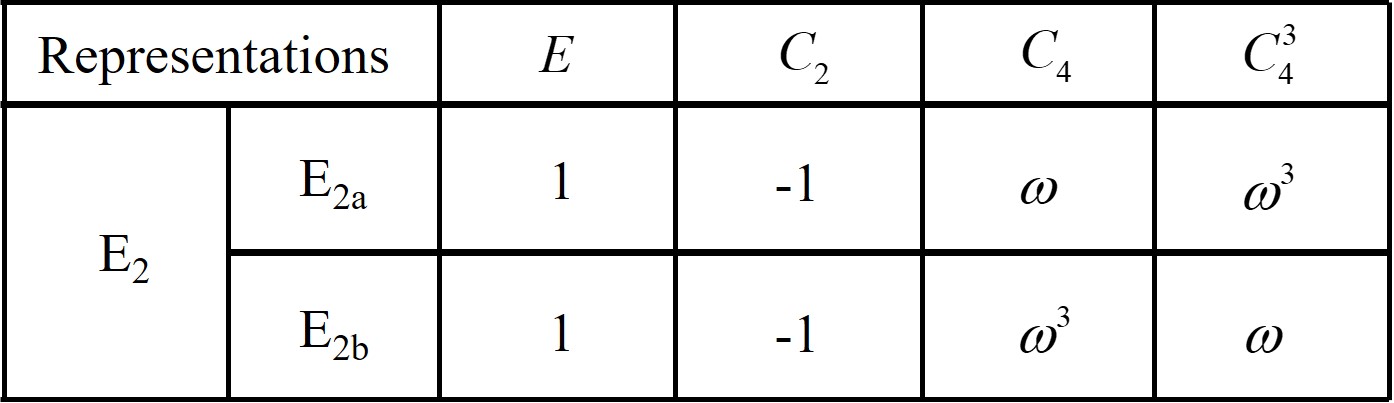
**

**Table S1** Character table for the E2 irrep [2], where *ω* = exp(2πi/4)

**Supplementary Note 3: The analysis of the two-level MO coupled Hamiltonian**

The effective Hamiltonian for an open (non-Hermitian) photonic system can be written as [4-6]:

(S1)

where *HB* is a Hermitian operator giving rise to real eigenvalues for the eigenstates. Γ is an operator that controls the loss of the system. In the main text, we consider two degenerate radiation-guided resonance modes (dipole modes). The Hamiltonian in Eq. (S1) thus becomes:

(S2)

The two diagonal terms (*ω* – *iγ*) represent the degenerate complex frequency arising from the radiation loss, *V*12 denotes the coupling strength between the two degenerate dipole modes, which is related to the magnetization strengths Mr. The complex eigenfrequencies *ω±* are solutions of the Hamiltonian H to the following dispersion relation:

(S3)

Since the coupling strength *V*12 is related to Mr​, when Mr is absent, *V*12 is 0, causing the two resonant modes to degenerate completely. When Mr is present, *V*12 is nonzero. Consequently, the MO couplings between the two degenerate modes induce Zeeman splitting of the energy bands. In this case, the eigenvectors corresponding to the Hamiltonian *H* can be derived as:

(S4)

which represents two circularly polarized states with opposing chirality. In the following, we rigorously derive the relationship between *V*12 and [*μ*]. Firstly, we consider the vacuum Maxwell's equations:

and the constitutive relation: *.* Suppose the electric and magnetic fields are expressed as:and , respectively, and the eigenstate at frequency *ω* is the solution of the eigenvalue equation:

(S5)

with

According to perturbation theory, *H* can be expressed: *H* = *H*0 + *V*, where *H*0 is a non-magnetic partand *V* isa gyrotropic perturbation:

When *κ* << *μ*1, starting from Eq. (S5) and expanding to the first order of *κ*, we have:

(S6)

where and are degenerate modes, and their corresponding eigenfrequencies are *ω*1 *= ω*2 *= ω*, is the diagonal term of [*μ*], and *Ni*(*i* = 1, 2) is the normalized constant as:

From Eq. (S6), it can be observed that the coupling strength *V*12 is related to the magnetization strengths Mr.

**Supplementary Note 4: Tune the chirality of the robust intrinsic C points by reversing the magnetization direction**

For conventional methods to achieve optical chirality by breaking the in-plane/out-of-plane structural symmetry, the optical chirality remains fixed when the structural parameters are determined, making it impossible to tune the optical chirality without modifying the photonic structures. In the main text, we demonstrate that when Mr is along the +*z* direction, the two intrinsic C points at the point can selectively respond to LCP and RCP light and exhibit high circular dichroism (CD) values. Interestingly, when the magnetization direction is reversed from +*z* to -*z*, the chirality of the intrinsic C points flips without altering the photonic structures, as shown in Fig. S3.


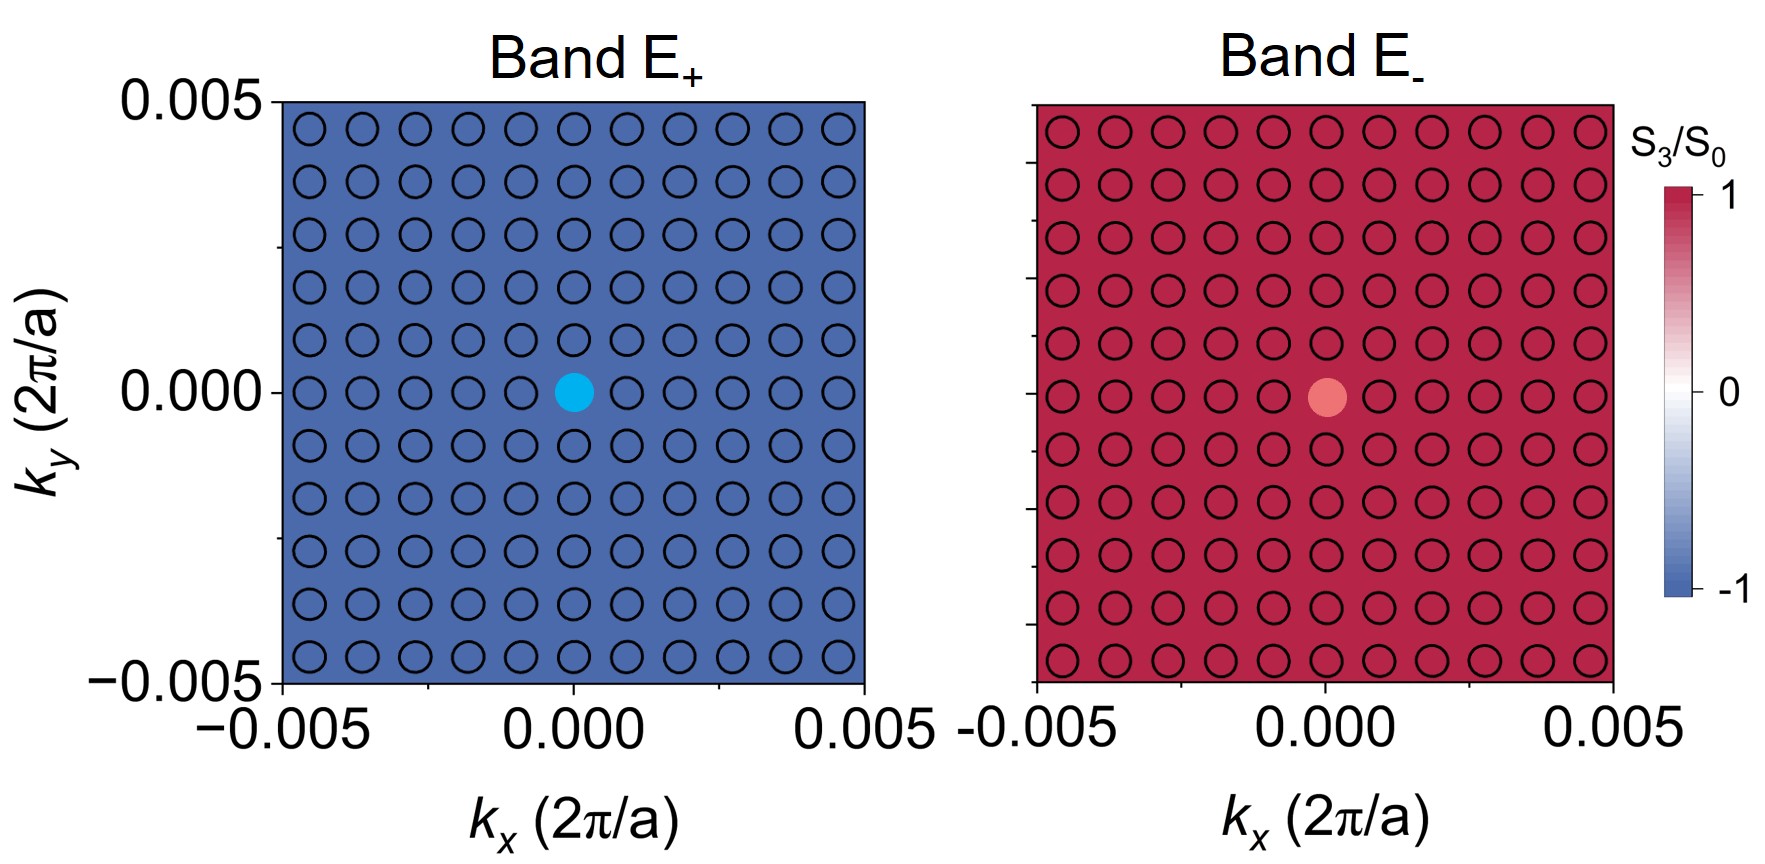


**Fig. S3 | Switching the chirality of the intrinsic C points by reversing the magnetization direction.** The far-field polarization of the band E+ and E- with the magnetization direction along the -*z* direction. Compared to Figs. 2e-2f, the chirality of the intrinsic C points is reversed.

**Supplementary Note 5: Methods to obtain far-field polarization states and Stokes parameters**

The far-field polarization states are obtained through the finite element method. The calculation zone in the *x*-*y* plane is defined as a unit cell of the gyromagnetic PhCs, with Bloch boundary conditions applied at the unit cell boundaries using the in-plane wave vector **k**|| (*kx*, *ky*). In the *z*-direction, perfectly matched layers are adopted to absorb the mode radiation. The eigenfrequency solver is utilized to compute the eigenfield ***E***(*x*, *y*, *z*). Subsequently, the far-field components ***c***(**k**||) corresponding to the in-plane wavevector **k**|| are derived using the relation [7-8]:

(S7)

The integration is carried out on the *x*-*y* plane above the unit cell. To characterize the polarization state of the far-field components ***c***(**k**||), we decompose them into the subspace formed by TE- and TM-polarized plane waves sharing identical in-plane wave vector **k**||. The resulting amplitudes in the *s*-*p* plane are expressed as:

(S8)

Where , is the unit vector perpendicular to the slabs, is parallel to the wavevector. The 2D polarization vector is further projected onto the *x*-*y* plane:

(S9)

where .

The Stokes parameters [S0, S1, S2, S3], which describe the polarization state of the far field with the in-plane wave vector **k**||, can be derived from the two projected amplitudes. Specifically, they are given by:

(S10)

The ellipticity can be expressed as: and circular polarization states with different chirality can be achieved with.

**Supplementary Note 6: Robust intrinsic C points with high-Q at the Γ point**

Achieving a chiral response with high CDs while maintaining a high Q factor is crucial to significantly enhancing chiral light-matter interactions. Here, the structural parameters are consistent with Fig. 2 in the main text. As shown in Fig. S4a, two bulk bands of the gyromagnetic PhCs without magnetization degenerate at the Γ point (black dots), the inset shows the electric field distributions of the two degenerate dipole modes. The far-field polarizations of bands G and H are shown in Fig. S4b and S4c, respectively, from which we can see that the far-field polarization at the Γ point is linearly polarized. When the magnetization is present, the MO couplings between the two degenerate dipole modes will induce Zeeman splitting and lift the degeneracy of the two bulk bands at the Γ point, as shown in Fig. S4d, where the dispersions of the upper and lower bands are represented by the red and blue lines, respectively. Figs. S4e and S4f show the far-field polarization of the bands E3±. It can be seen that the two hybridized modes at the Γ point (cyan and red dots) exhibit circularly polarized states with opposite chirality. Fig. S4g presents the ratio of Stoks parameters S3/S0 of the two coupled eigenstates at the Γ point as a function of the geometrical parameters (*h*, *w*), which remains almost unchanged with different structural parameters and indicates the robustness of the intrinsic C points. And the radiation quality factors of the intrinsic C points (quasi-BIC) [4] are still high, as shown in Fig. S4h and S4i, respectively.

**
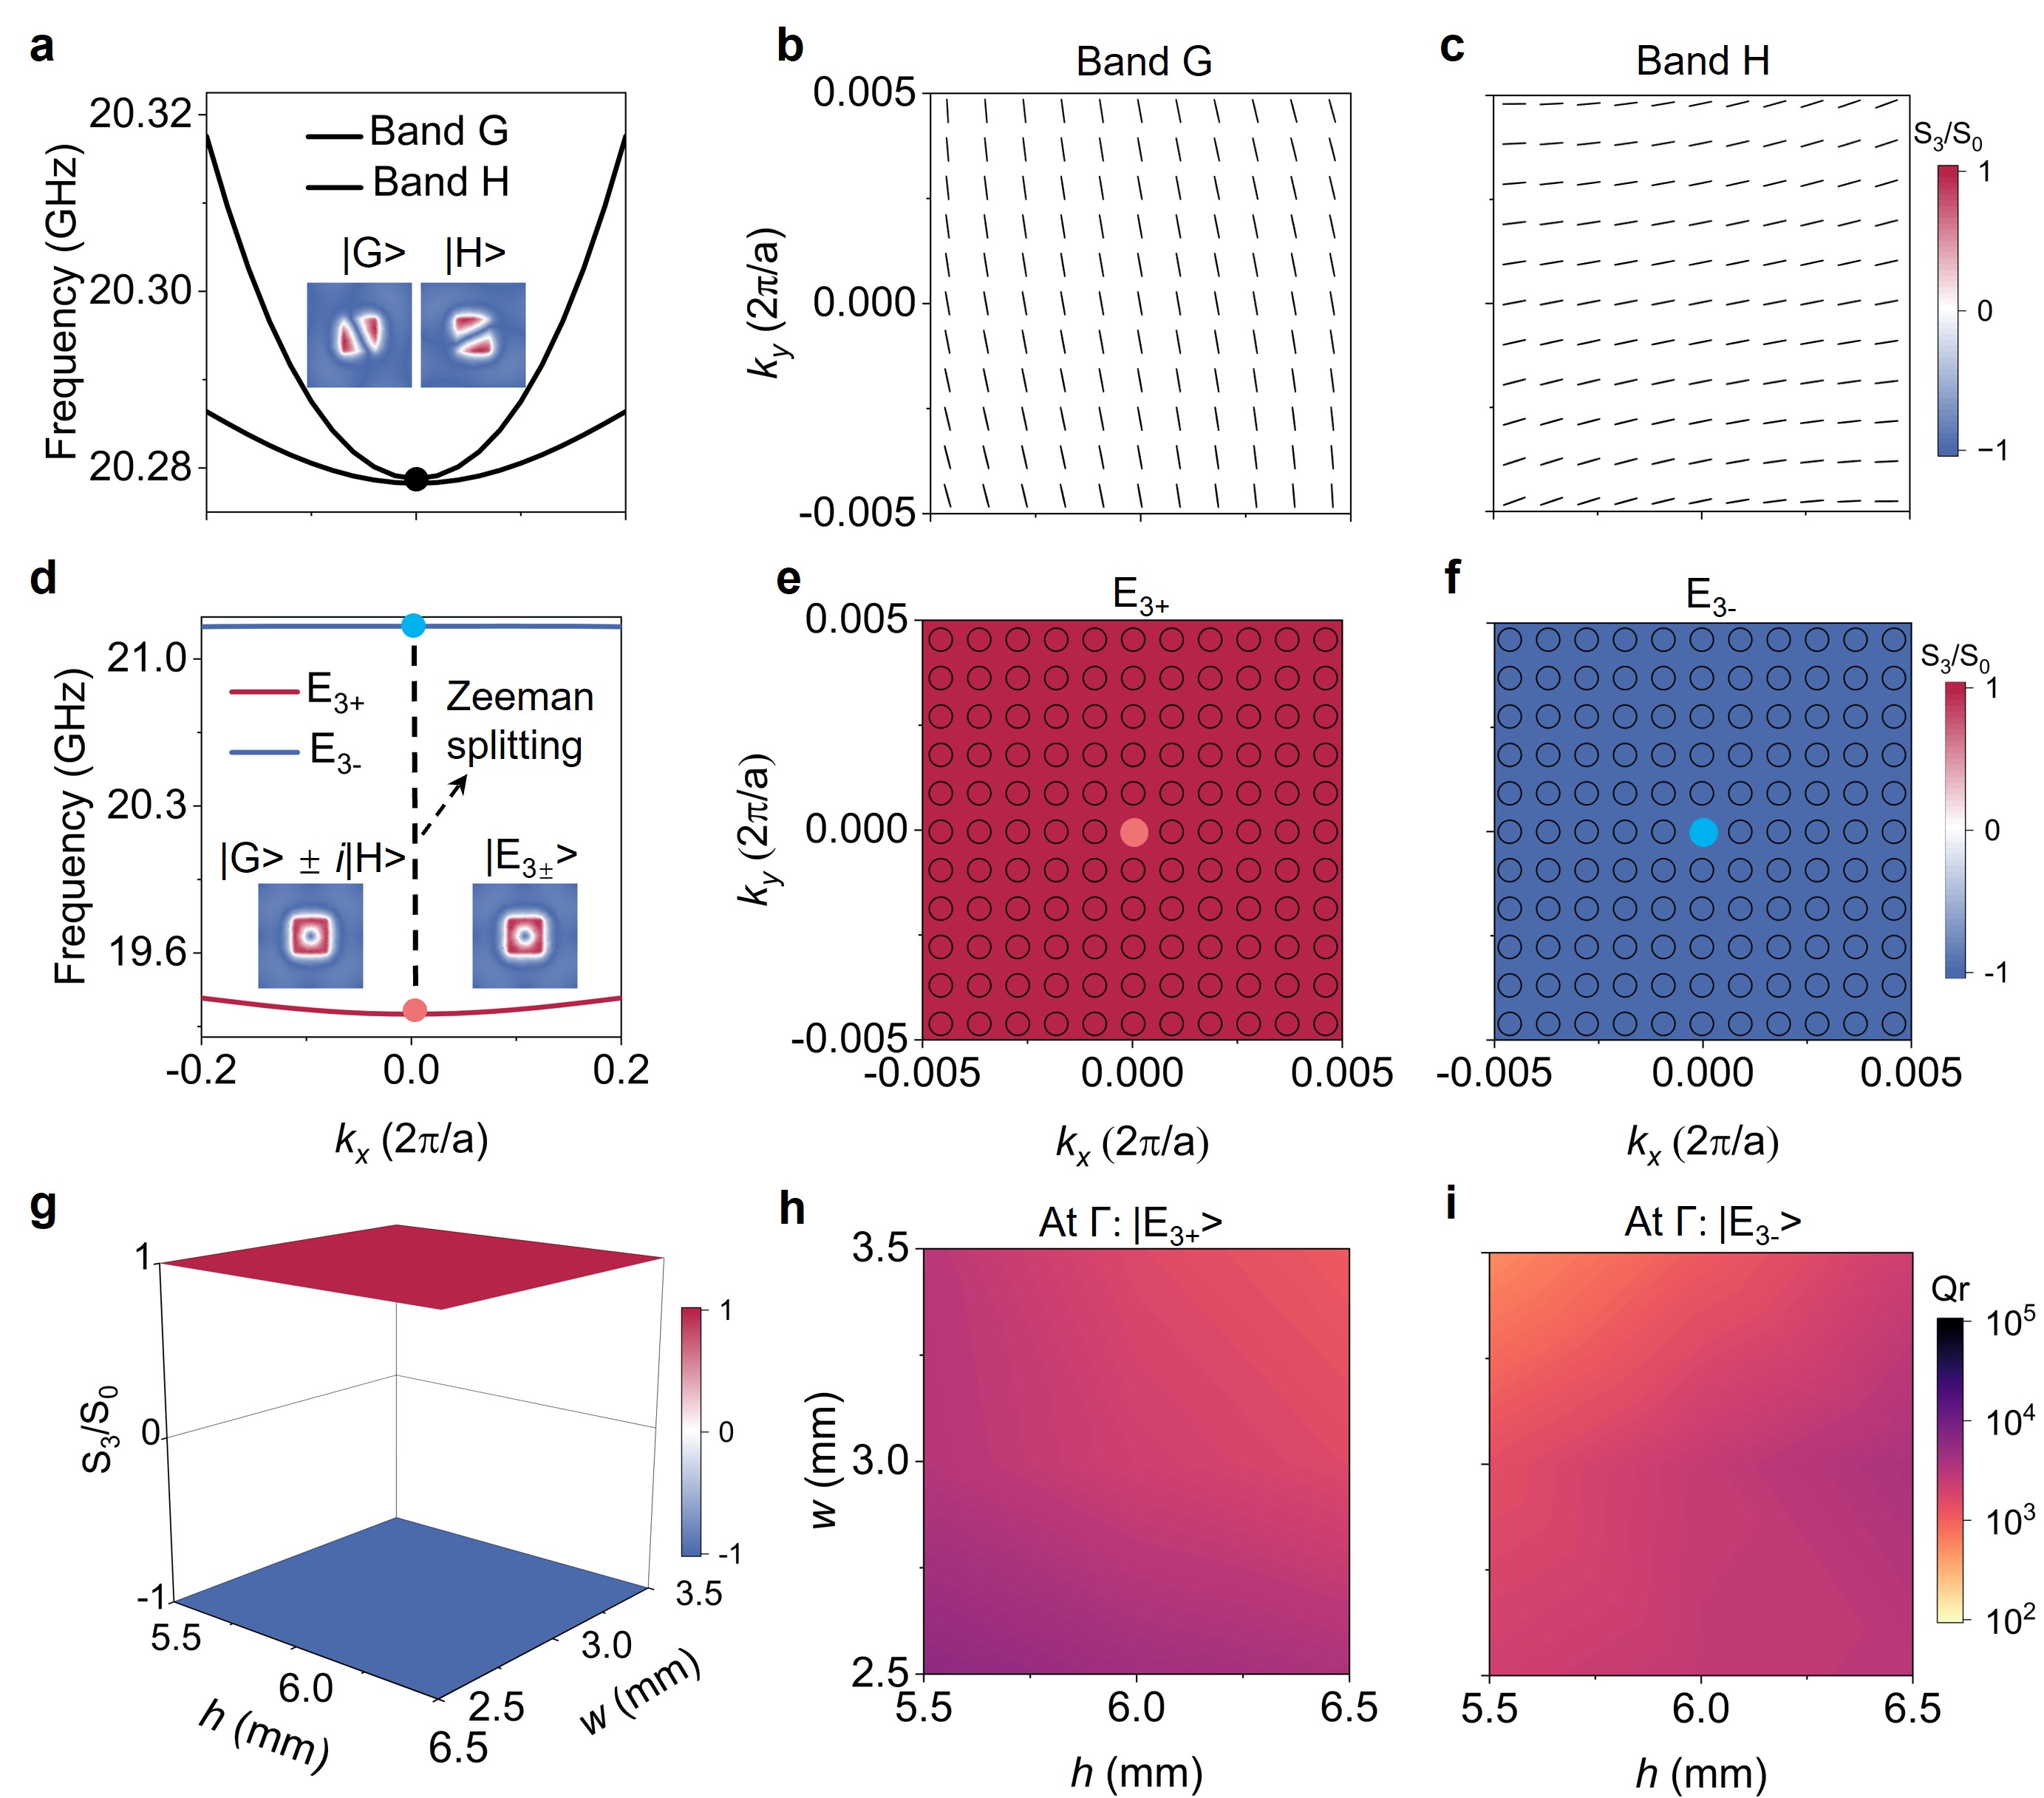
**

**Fig. S4 | Robust intrinsic C points with high-Q at the Γ point. a** Simulated band dispersion of the gyromagnetic PhCs without magnetization. **b**, **c** Thefar-field polarization corresponding to bands G and H, respectively, where the degenerate states at the Γ point exhibit orthogonal linear polarization. **d** Simulated band dispersion of the gyromagnetic PhCs with magnetization. The two bulk bands split due to the Zeeman effect induced by the MO couplings between the two originally degenerate dipole modes at the Γ point, and the two hybrid states (red and cyan dots) exhibit different chiral characteristics. **e**, **f** The far-field patterns corresponding to bands E3+ and E3-, respectively, which exhibit circular polarization with opposite chirality. **g** Evolution of the ratio of Stokes parameters S3/S0 of two coupled modes as a function of the structural parameters (*w*, *h*). **h**, **i** The radiation Q factors of the two coupled modes as a function of the structural parameters (*w*, *h*).

We then experimentally demonstrate the robust intrinsic C points with high Q factors. Due to experimental limitations, the geometrical parameters are set as: lattice constant *a* = 15mm, height *h* = 0.8a, and width *w* = 0.29a. We first calculated the band structure of the gyromagnetic PhCs without magnetization (Mr = 0) using the finite element method, as shown in Fig. S5a. Owing to C4v symmetry, a pair of degenerate modes with radiation quality factors (Qr) approaching 4000 appear at the Γ point. When the magnetization is present (Mr ≠ 0), the degeneracy is lifted due to the MO couplings between the degenerate modes, resulting in two circularly polarized states (cyan and red dots) with opposite chirality, as shown in Fig. S5b. The upper band (red line) exhibited a radiation quality factor of Qr = 996, while the lower band (blue line) exhibited a radiation quality factor of Qr = 5×104. Figs. S5c-S5f present the simulated (Figs. S5c-S5d) and measured (Figs. S5e-S5f) transmission spectra and corresponding CD spectra under LCP (blue line) and RCP (red line) normal incidence, respectively. At the resonant frequency, the RCP waves (red line) can be transmitted entirely while the LCP waves (blue line) are almost blocked, yielding a high CD value approaching 1 and confirming that the gyromagnetic PhCs can realize chiral optical response with both high Qr and strong CD.

**
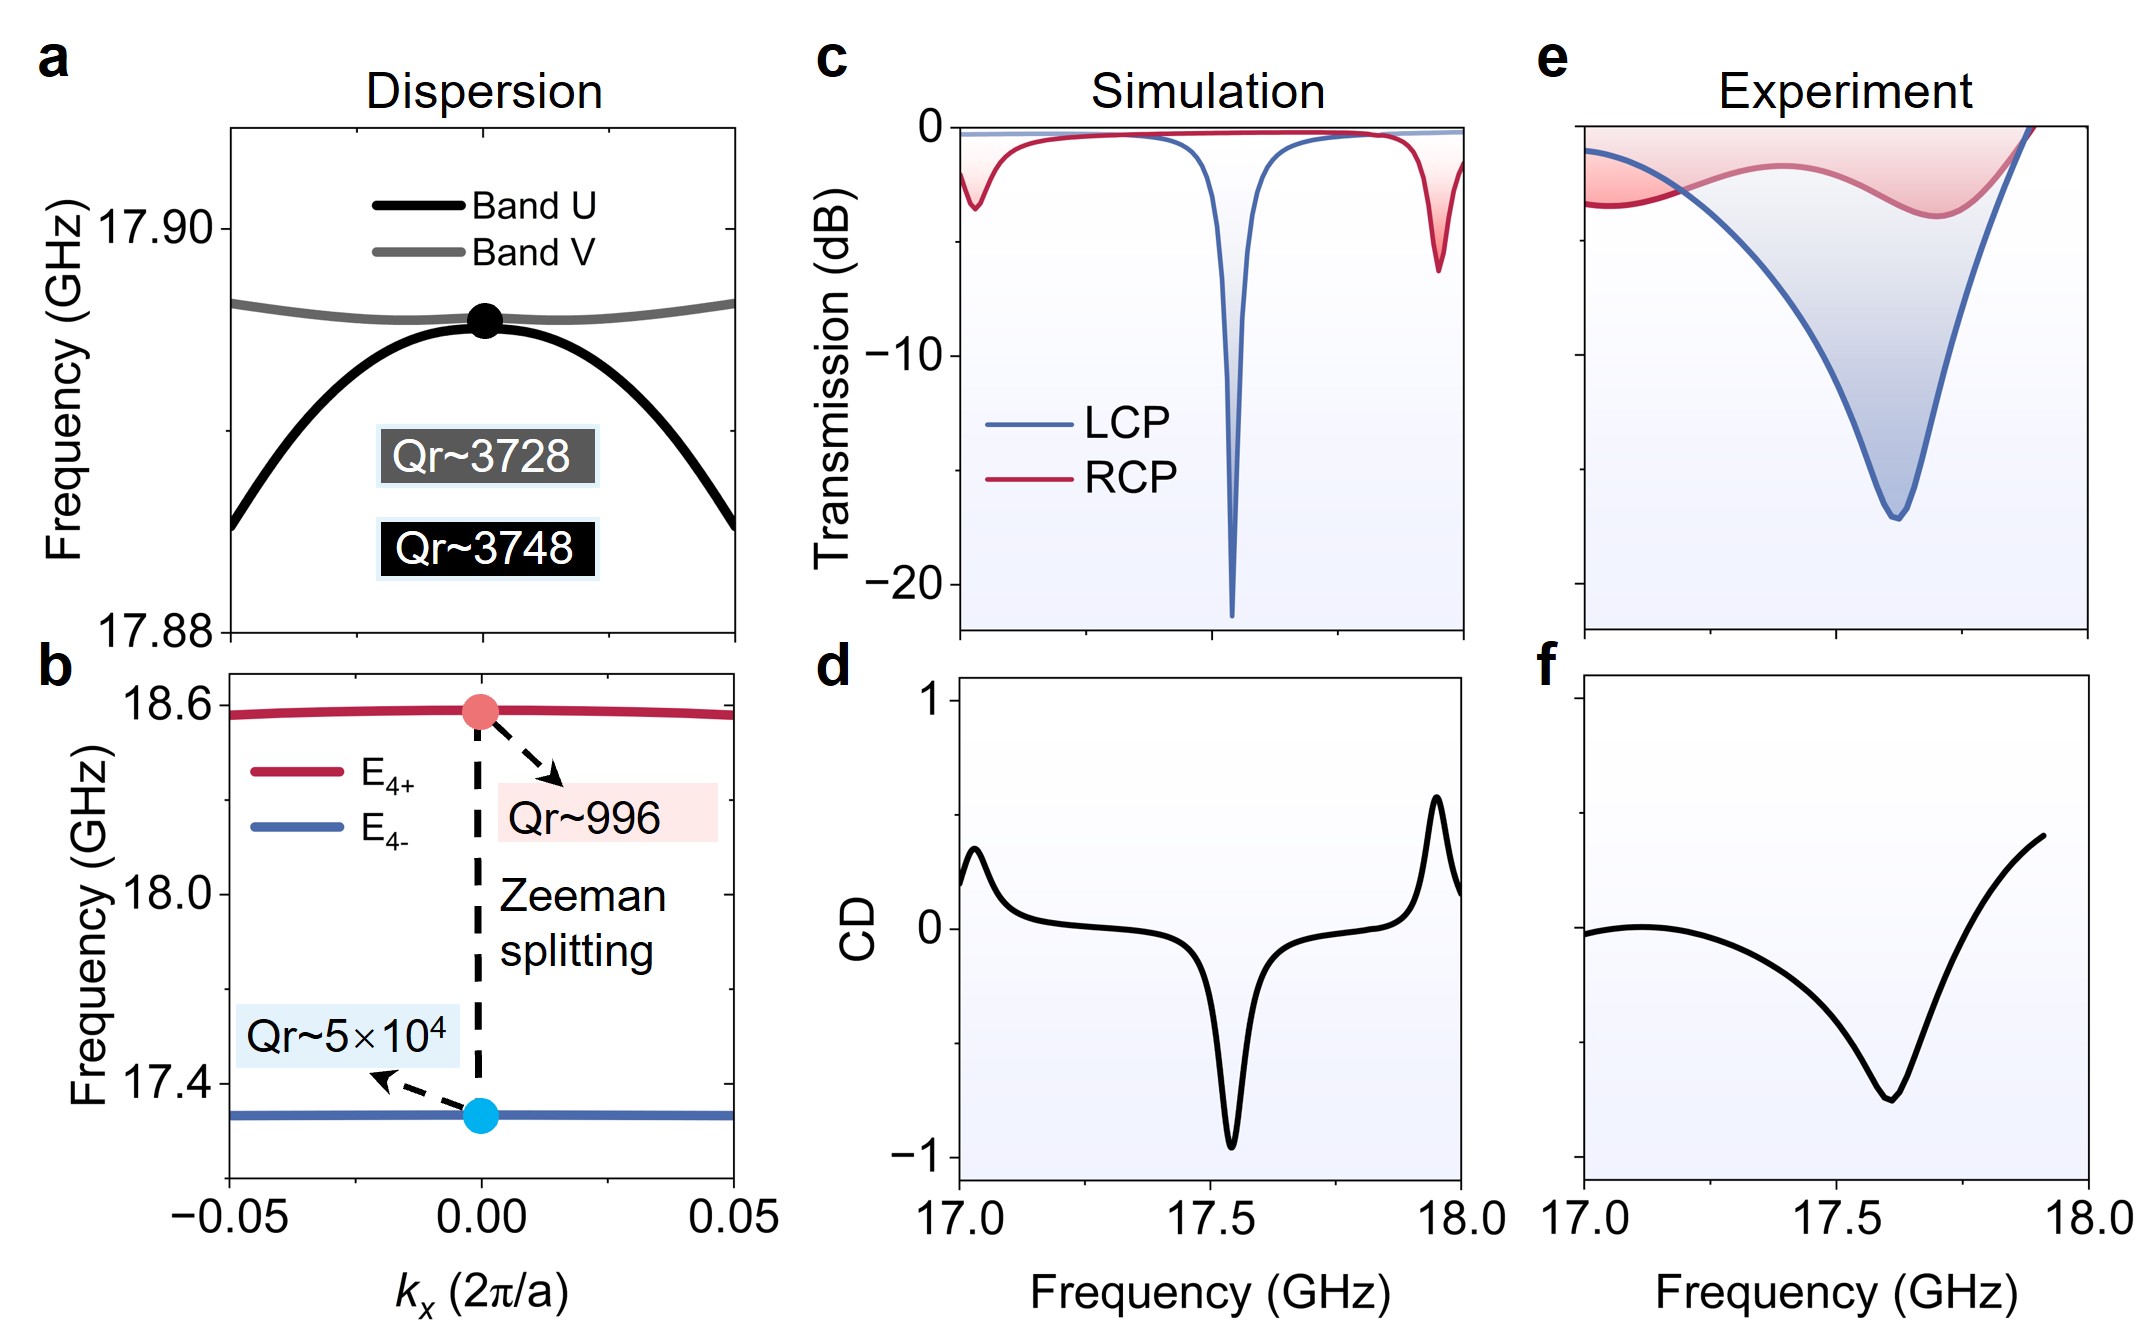
**

**Fig. S5 | Experimental observation of robust intrinsic C points for high-Q resonance modes. a, b** Simulated band dispersion of the gyromagnetic PhCs without (**a**) and with (**b**) magnetization.We take the lower band (blue line) as the research object (Qr ~ 5×104). **c**-**f** Simulated (**c**, **d**) and measured (**e**, **f**) transmission and CD spectra for LCP (blue line) and RCP (red line) normal incidence, respectively, the Mr is along the +*z* direction.

**Supplementary Note 7: Experimental setup for characterizing the transmission and CD spectra**

To experimentally measure the transmission and CD spectra, we adopt two identical circularly polarized antennas connected to a vector network analyzer as the source and probe, and they are positioned on opposite sides of the experimental sample, as shown in Fig. S6. To focus electromagnetic waves onto the samples, two Teflon lenses with a focal length of 30 cm are placed between the gyromagnetic PhCs and the circularly polarized antennas on both sides. The central axes of the antennas, the gyromagnetic PhCs, and the Teflon lenses are meticulously aligned at the same elevation. Electromagnetic wave absorbing materials are adopted to mitigate scattering from the supporting structures and suppress the environmental electromagnetic interference. The antenna generates a spherical wavefront at the sample plane. Owing to the considerable distance between the sample and the antenna, the phase discrepancy remains below 22.5° within a diameter range of 130 mm at the sample plane. Consequently, the spherical wavefront can be effectively approximated as a plane wave.


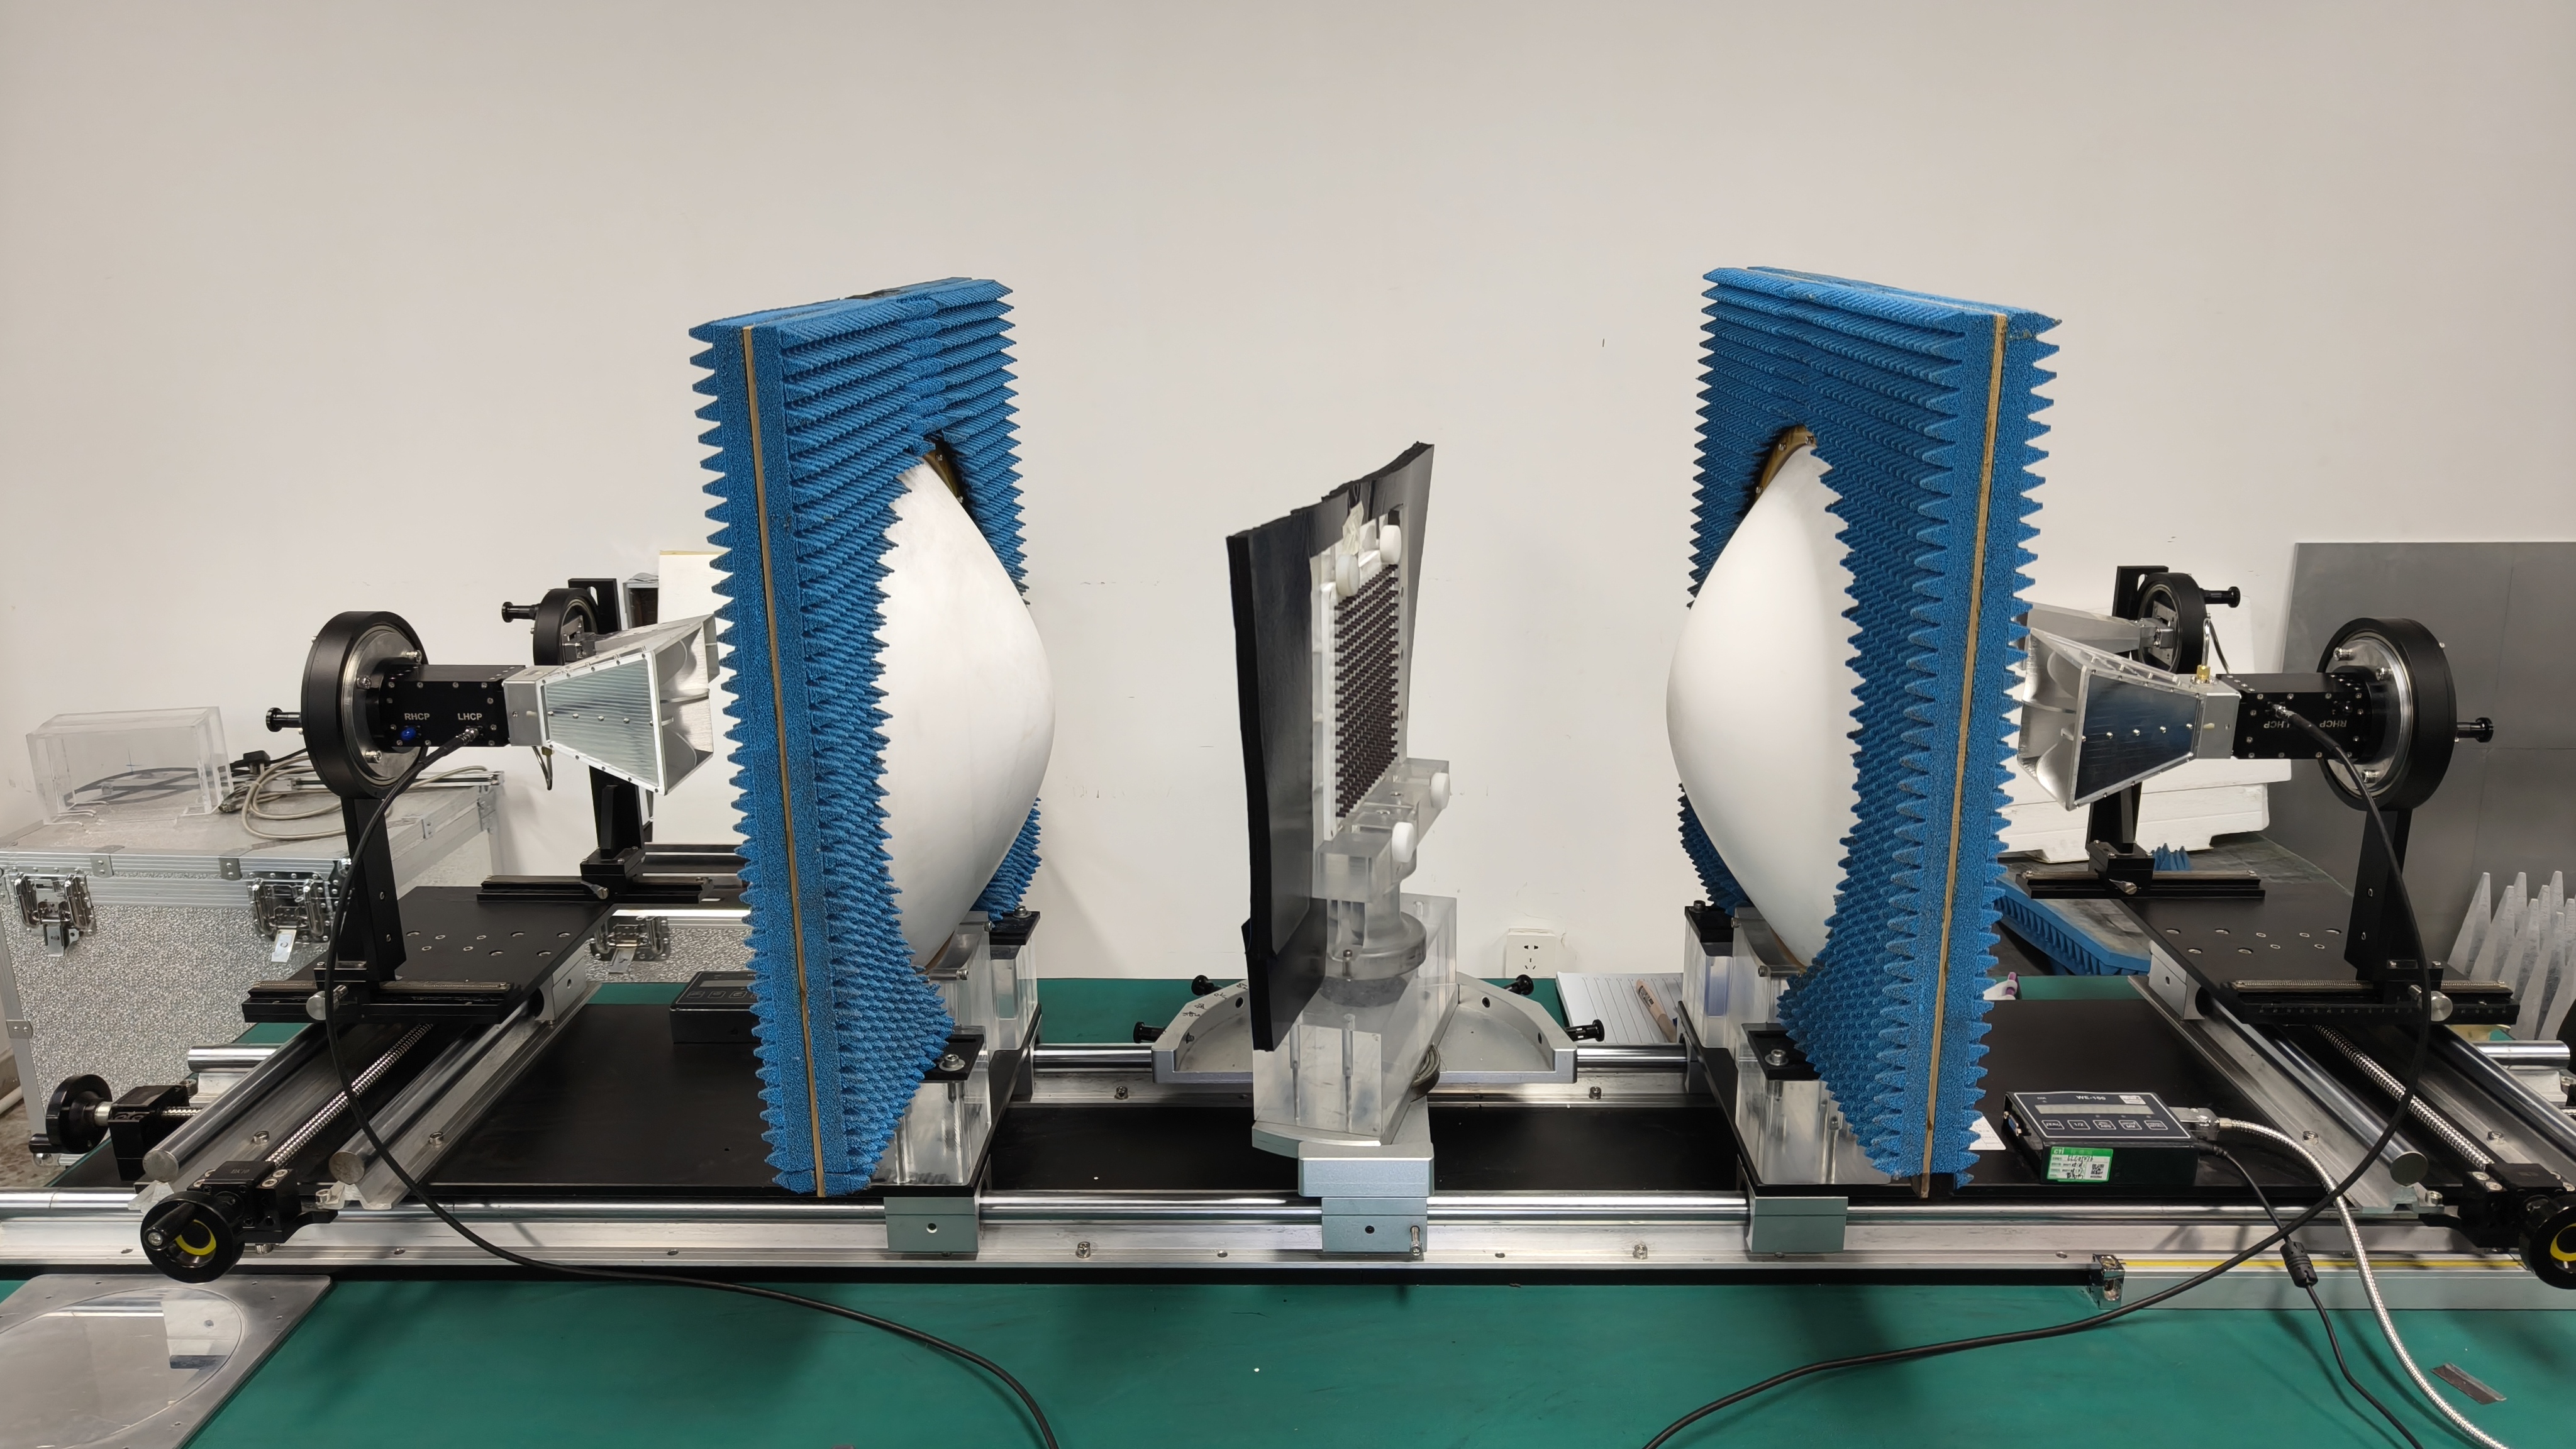


**Fig. S6. | The custom-built experimental setup for performing free-space transmission measurements.**

**Supplementary Note 8: Generation of robust intrinsic C points at higher frequency**

In the main text, the analysis mainly focuses on the two bulk bands at low frequencies; here, we study the other two bulk bands at higher frequencies. As shown in Fig. S7a, two bulk bands C and D degenerate at the Γ point (black dots) when the magnetization is absent (Mr = 0). Figs. S7b and S7c show the far-field polarization of bands C and D, respectively. It can be seen that the far-field polarization at the Γ point is linearly polarized (L points) and mutually orthogonal. When the magnetization is present (Mr ≠ 0), the off-diagonal components of the permeability tensor will be nonzero. The MO couplings between the two degenerate modes lift the degeneracy of the bulk bands C and D at the Γ point due to the Zeeman effect, as shown in Fig. S7d. Figs. S7e and S7f present the far-field polarization of the bulk bands E2±, from which we can see that the two hybridized modes (cyan and red dots) at the Γ point exhibit circularly polarized states with opposite chirality. Next, we investigate the robustness of the intrinsic C points. Fig. S7g shows the ratio S3/S0 of two hybridized eigenstates at the Γ point (red and cyan dots) as a function of magnetization strengths with fixed geometrical parameters *w* and *h*, it can be seen that the ratio S3/S0 remains nearly constant with different positive (Mr​*​* along the +*z* direction) or negative (Mr​*​* along the -*z* direction) , and only decreases to zero and switches sign at , indicating the robustness of the intrinsic C points against magnetization strengths. Similarly, Figs. S7h and S7i present the ratio S3/S0 of the two coupled eigenstates at the Γ point as a function of geometrical parameters *w* and *h* with fixed MO coupling strength , it can be seen that the ratio S3/S0 is almost unchanged with different geometrical parameters, indicating the intrinsic C points are insensitive to the structural parameters

**
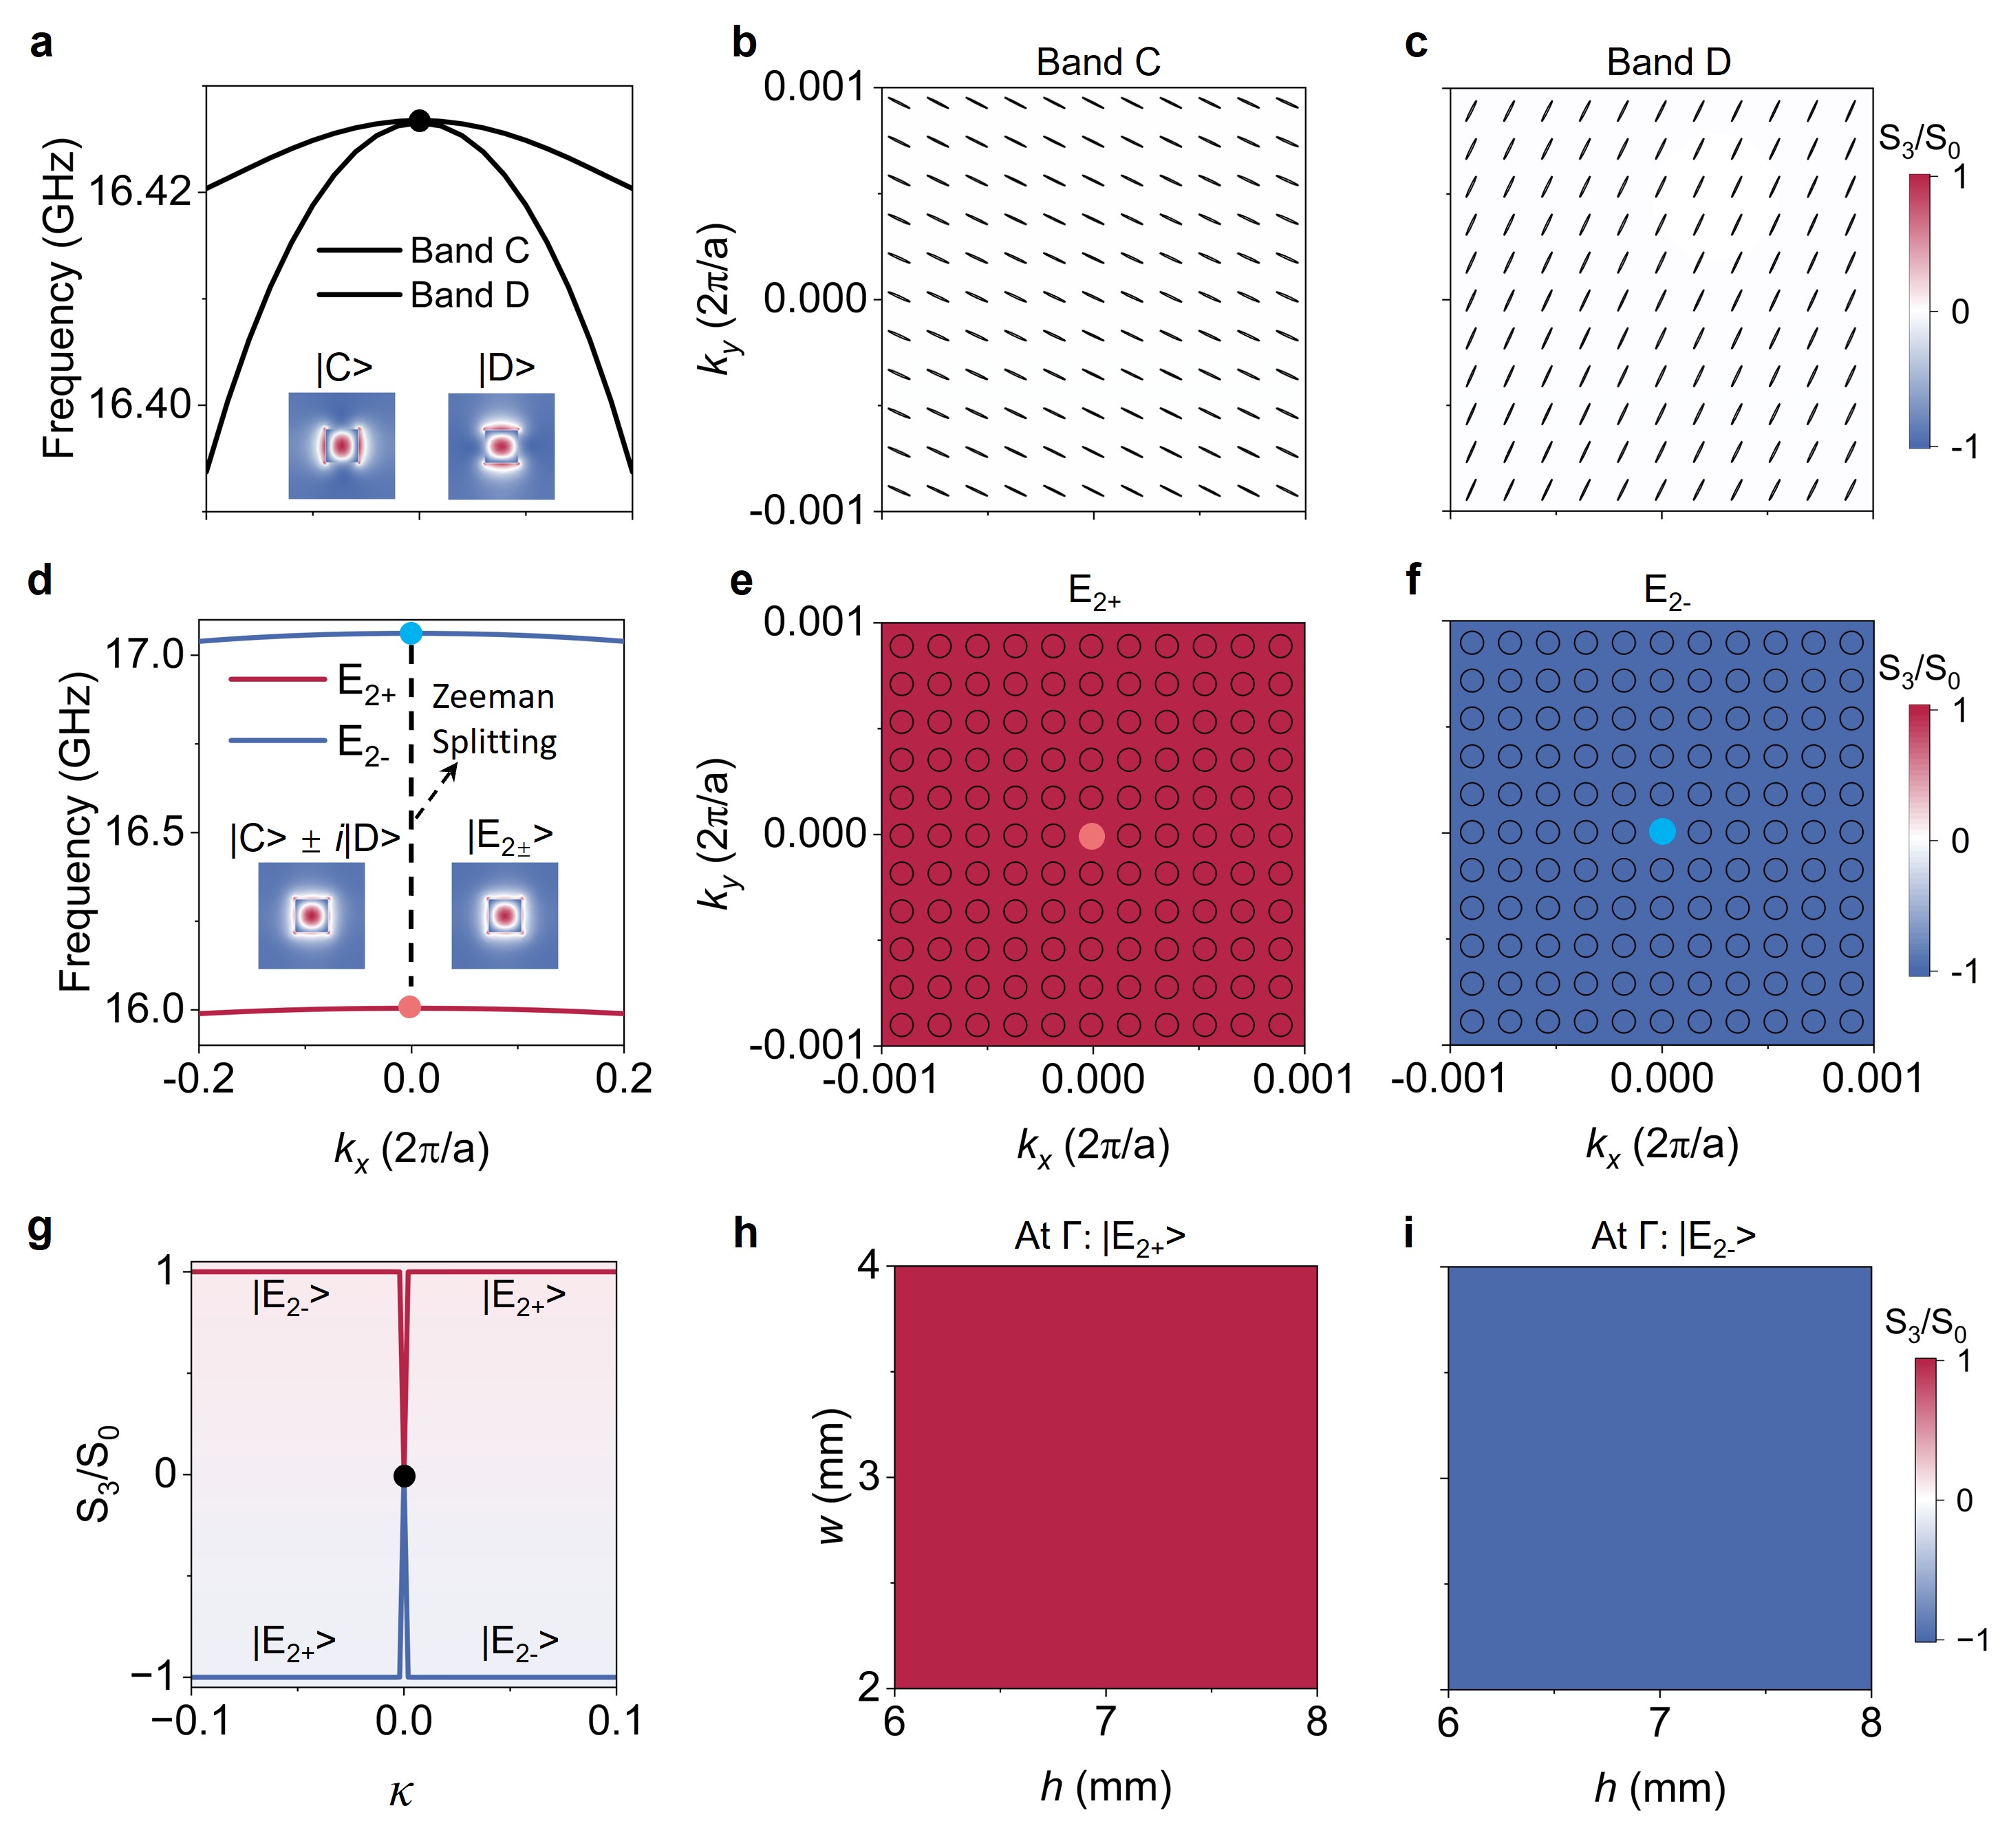
**

**Fig. S7 | Robust generation of intrinsic C points at higher frequencies. a** Simulated photonic band structure of the gyromagnetic PhCs without magnetization. Two bulk bands degenerate at the Γ point (black dot). The insets show the electric field distributions of two degenerate modes at the Γ point. **b**, **c** Simulated far-field polarization of bands C and D, respectively, where the degenerate modes at the Γ point exhibit orthogonal linear polarizations. **d** Simulated photonic band structure of the self-biased gyromagnetic PhCs with magnetization. Two bulk bands split due to the MO coupling induced Zeeman splitting, and the two hybrid circularly polarized states at the Γ point (cyan and red dots) exhibit opposite chirality. The left inset shows the electric field distribution of the theoretically combined state of the two eigenstates in **a,** and the right inset shows the simulated electric field distribution of the eigenstates at the Γ point in **d**. **e**, **f** Simulated far-field polarization of bands E2+ and E2-, respectively, which exhibit circular polarization with opposite chirality. **g,** **h**, **i** Evolution of the ratio of Stokes parameters S3/S0 of the two hybrid circularly polarized modes as a function of the off-diagonal component (**g**) and the structural parameters *w* and *h*(**h-i**), respectively.

**Supplementary Note 9: Finite-element-method analysis of photonic chiral flat surfaces**

We have demonstrated the existence of photonic chiral flat surfaces through far-field measurements (Fig. 4). To further confirm the presence of photonic chiral flat surfaces along arbitrary incident directions, we selected the excitation frequencies marked by the red and blue triangles at the Γ point in Fig. S9 for investigation. Firstly, we analyzed the case corresponding to the blue triangle’s frequency. When illuminating the gyromagnetic PhCs structure with LCP and RCP light at arbitrary incident angles, the simulated transmission and CD spectra are shown in Fig. S8a, from which we can see that LCP (RCP) light exhibits low (high) transmittance and the corresponding CD value approaches -1 across the entire angular range, demonstrating strong chirality along arbitrary incident directions. Next, we examined the transmission and CD spectra at the red triangle’s frequency along arbitrary incident directions. As shown in Fig. S8b, the opposite results are observed: LCP (RCP) light exhibits high (low) transmittance, and the corresponding CD value approaches +1 across the entire angular range, indicating reversed chirality along arbitrary incident directions. In summary, Fig. S8 demonstrates that our gyromagnetic PhCs achieve robust optical chirality with near-unity CD values along arbitrary incident angles and directions at fixed frequencies, providing conclusive evidence for the existence of photonic chiral flat surfaces.


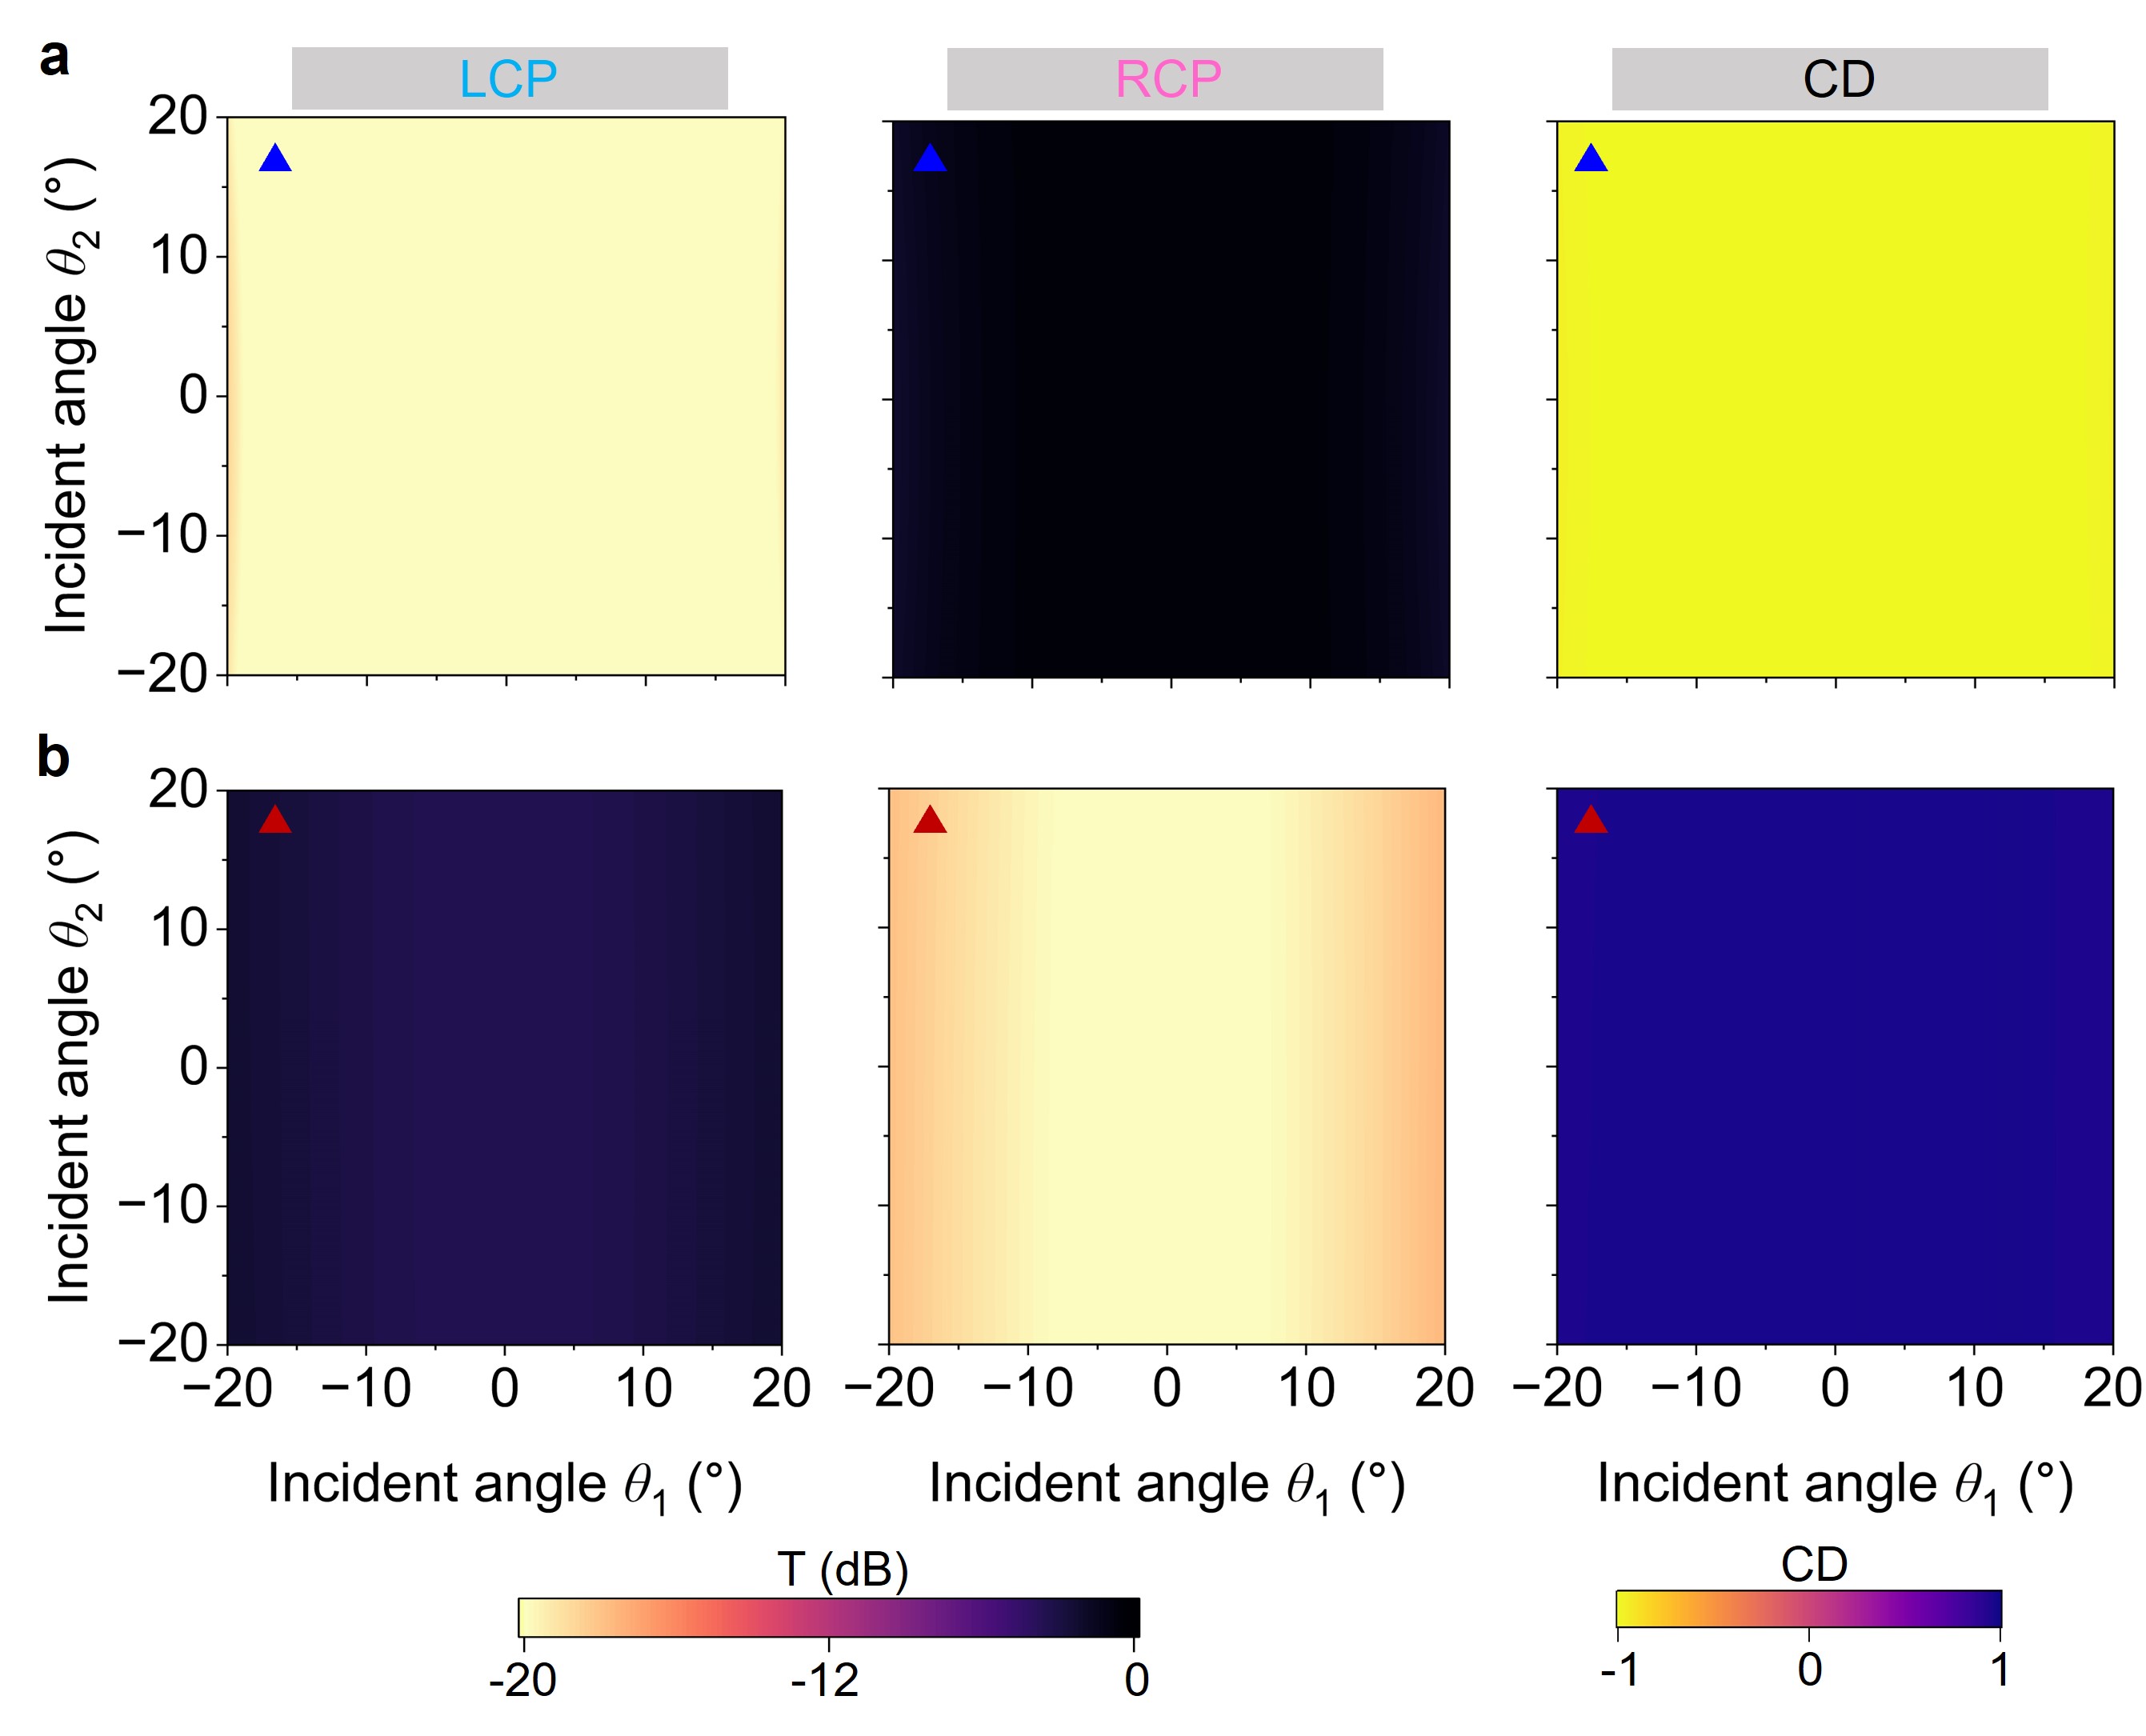
 **Fig. S8 | Finite element method analysis of photonic chiral flat surfaces. a**, **b** Simulated transmission (first and second columns) and CD (third column) spectra of gyromagnetic PhCs (magnetization direction orients along the +*z* direction) under arbitrary oblique incidence of LCP and RCP light (The incident frequencies are marked by the red and blue triangles in Fig. S9a and S9b).

**Supplementary Note 10:** **Near-field analysis of photonic chiral flat surfaces**

In the main text, we have demonstrated that the far-field transmission spectra exhibit a distinct contrast between RCP and LCP light. Now we show that this phenomenon can also be observed in the near field. The near-field optical chiral density (OCD) at any position is quantified as [9-10]:

(S9)

Here, represents the vacuum permittivity, denotes the angular frequency of light, ***E**** is the complex conjugate of the electric field, and ***B*** corresponds to the magnetic field. We normalize the OCD of the gyromagnetic PhCs by the physical constant and plot its value at the resonance wavelength. Fig. S9a and S9b (first column) show the transmission spectra of the gyromagnetic PhCs under RCP and LCP incidence, respectively, from which we can observe two pairs of photonic chiral flat bands. To analyze the photonic chiral flat surfaces via near-field OCD, we take the band marked by the horizontal green dashed line as an example. Three distinct incident angles (8°, 12°, 16°) are selected, corresponding to the purple, blue, and red pentagrams in the transmission spectra. The near-field OCD distributions of the gyromagnetic PhCs with different oblique incident angles (second to fourth columns) exhibit significant differences between RCP (Fig. S9a) and LCP (Fig. S9b) excitations and directly confirm the optical chirality. Moreover, the near-field OCD remains nearly invariant for different incident angles, consistent with the far-field behaviors, and further verifies the existence of photonic chiral flat surfaces.


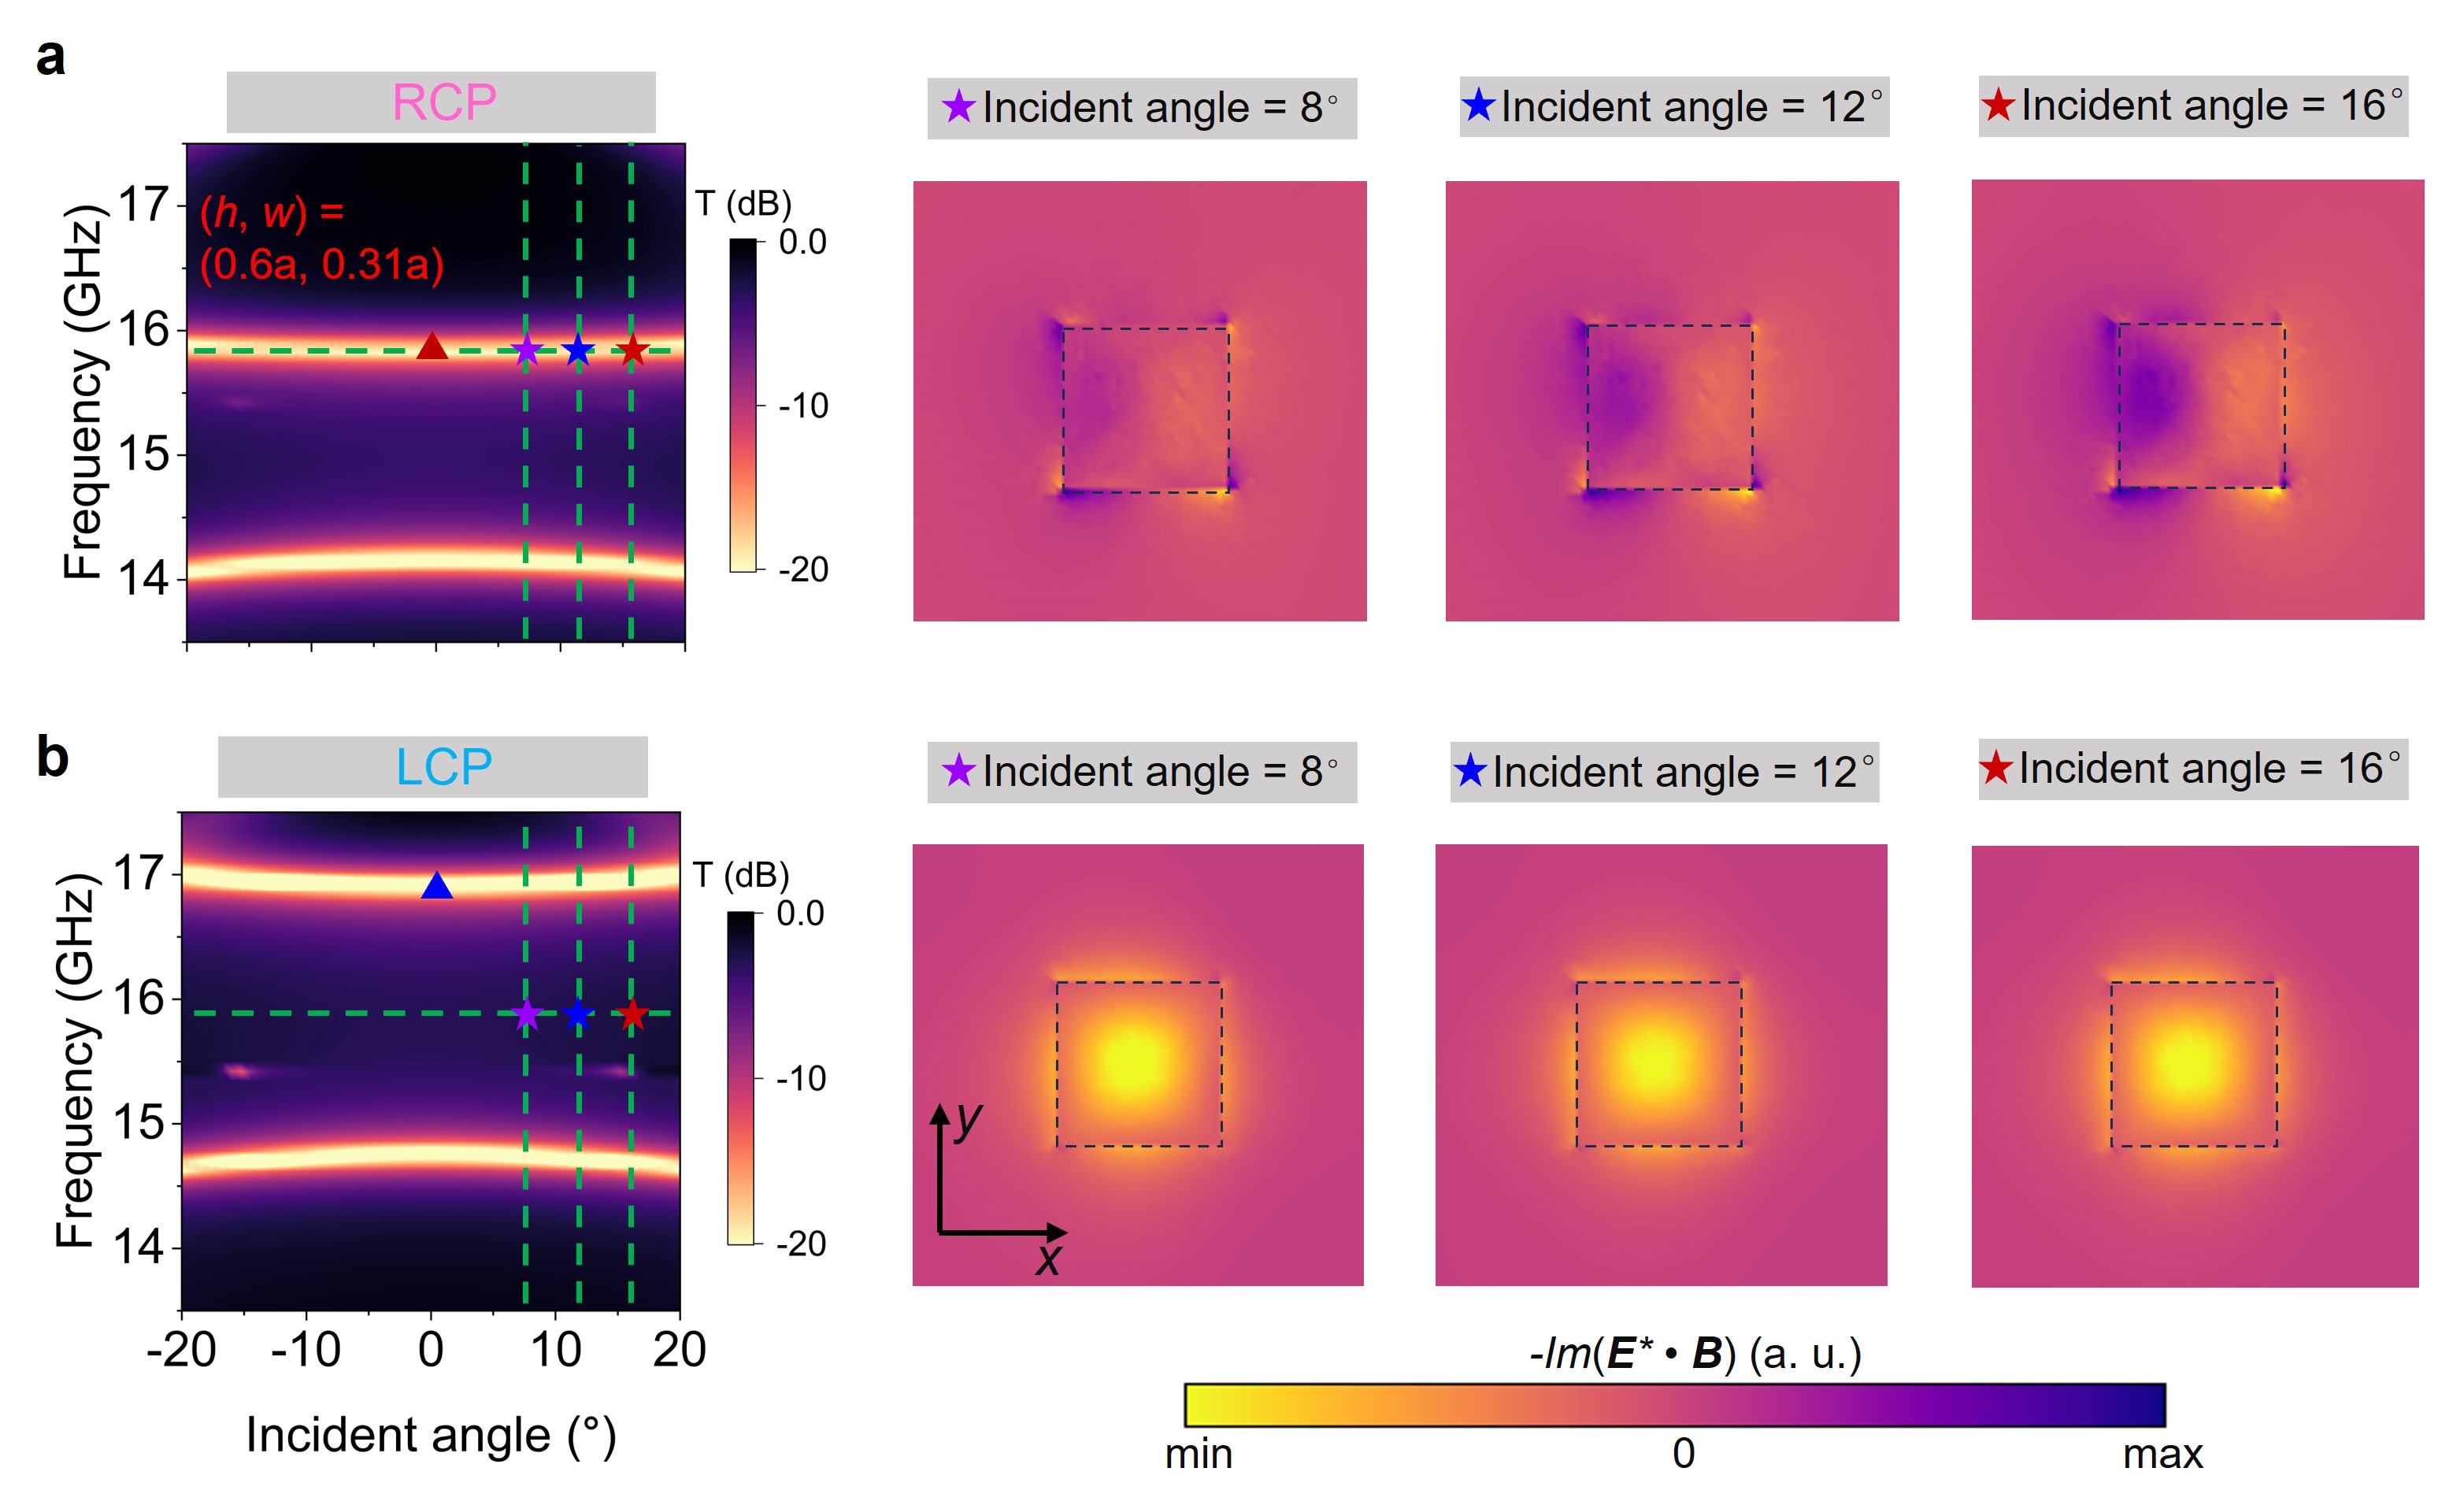


**Fig. S9** **|** **Near-field demonstration of photonic chiral flat surfaces. a**, **b**. First columns: simulated transmission spectra versus frequency and incident angle under RCP and LCP incidence, respectively. Second to fourth columns: normalized OCD distributions with different incident angles, corresponding to the pentagrams in the transmission spectra.

**Supplementary Note 11: Switching the** **chirality of photonic chiral flat surfaces**

Now we experimentally demonstrate the switching of the chirality of photonic chiral flat surfaces in self-biased gyromagnetic PhCs by reversing the magnetization direction (white arrows), as illustrated in Figs. S10a. Figs. S10b-S10c present the measured transmission and CD spectra of two gyromagnetic PhCs (the magnetization direction is reversed from +*z* to -*z* direction) under oblique incidence of LCP and RCP light with different geometrical parameters, respectively. Compared with Fig. 4 in the main text, it can be seen that both gyromagnetic PhCs exhibit switched chiral resonance within a wide range of incident angles ±20o.


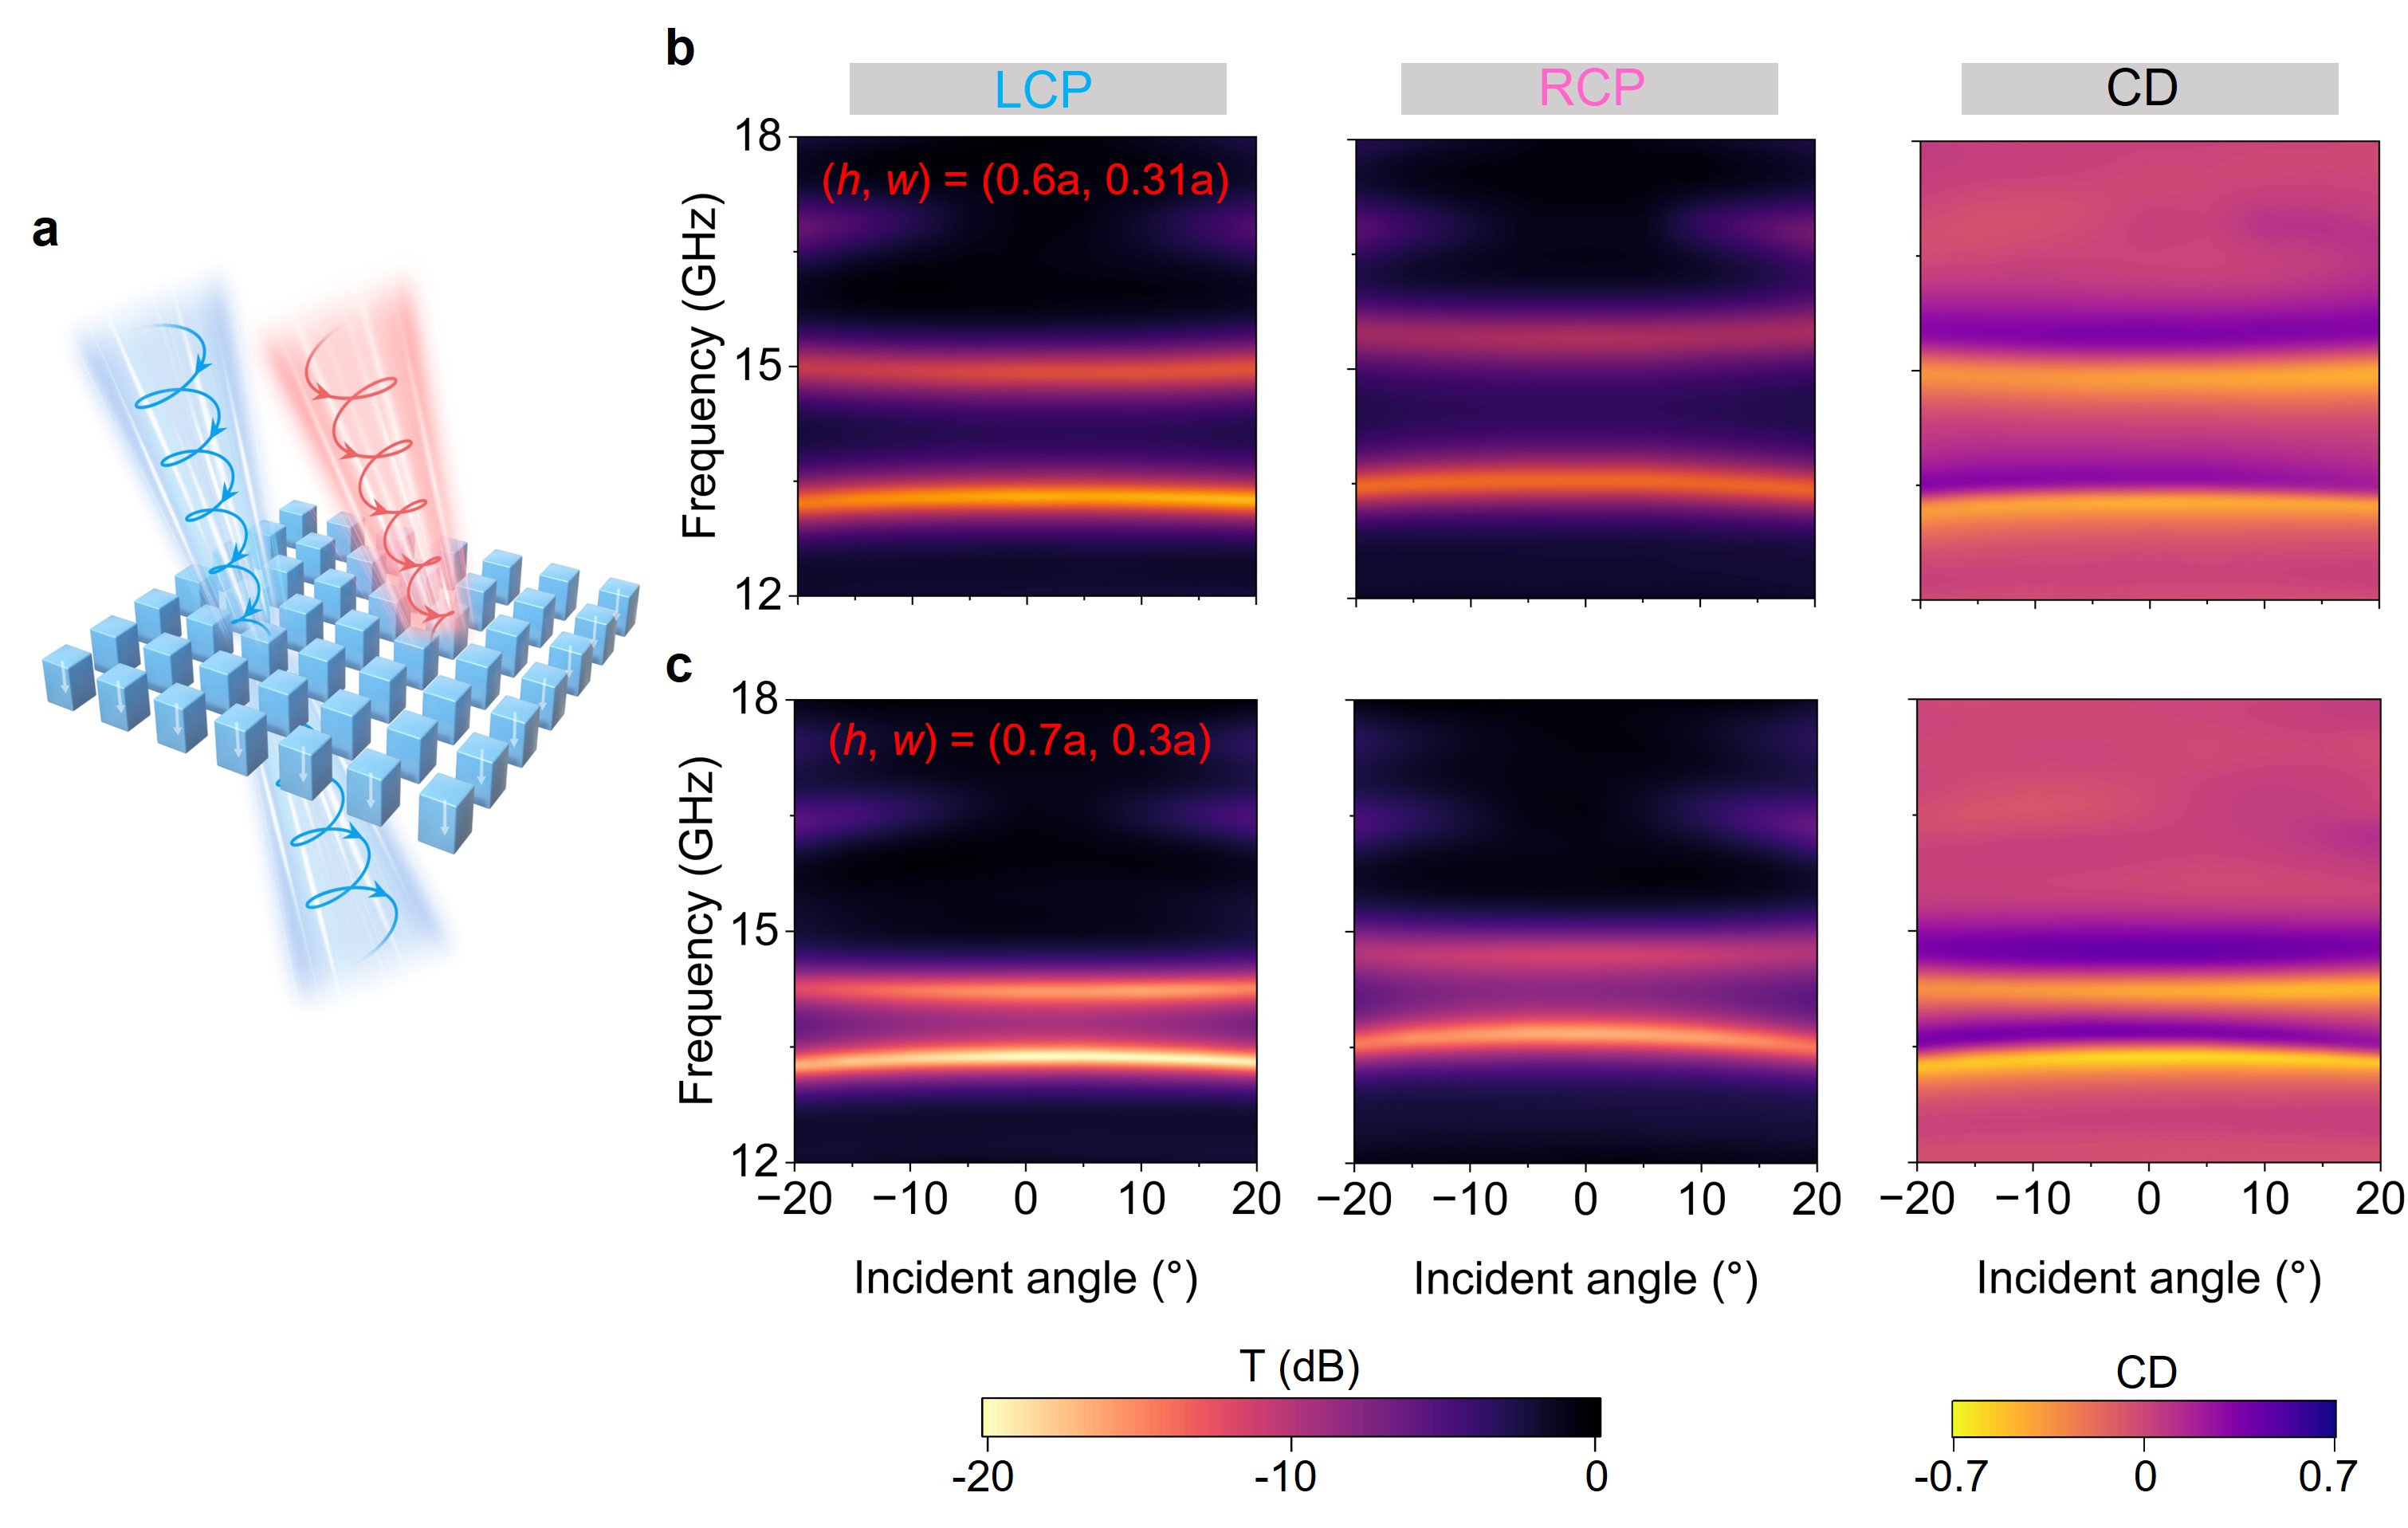


**Fig. S10** **| Experimental demonstration of the switching of photonic chiral flat surfaces by reversing the magnetization direction. a** Schematic of the experimental setup with oblique incidence of RCP and LCP waves. The magnetization direction (white arrows) orients along the -*z* direction. **b**, **c** Measured transmission and CD spectra of two self-biased gyromagnetic PhCs with different geometrical parameters under oblique incidence of LCP and RCP waves, respectively.

**References**

1.Yang, W. et al. A self-biased non-reciprocal magnetic metasurface for bidirectional phase modulation. *Nat. Electron.* **6**, 225-234 (2023).

2. Mildred S Dresselhaus, Gene Dresselhaus, and Ado Jorio. Group theory: application to the physics of condensed matter. Springer Science & Business Media, (2007).

3. Zhao, X. et al. Spin-orbit-locking chiral bound states in the continuum. *Phys. Rev. Lett.* **133**, 036201 (2024).

4. Lv, W. et al. Robust generation of intrinsic C points with magneto-optical bound states in the continuum. *Sci. Adv.* **10**, eads0157 (2024)

5. Wang, Z. & Fan, S. Magneto-optical defects in two-dimensional photonic crystals. *Appl. Phys. B* **81**, 369-375 (2005).

6. Hu, P. et al. Global phase diagram of bound states in the continuum. *Optica* **9**, 1353-1361 (2022).

7. Ye, W., Gao, Y. & Liu, J. Singular Points of Polarizations in the Momentum Space of Photonic Crystal Slabs. *Phys. Rev. Lett.* **124**, 153904 (2020).

8. Yoda, T. & Notomi, M. Generation and annihilation of topologically protected bound states in the continuum and circularly polarized states by symmetry breaking. *Phys. Rev. Lett.* **125**, 053902 (2020).

9. Chen, Y. et al. Observation of intrinsic chiral bound states in the continuum. *Nature* **613**, 474-478 (2023).

10. Choi, M., Alù, A. & Majumdar, A. Observation of photonic chiral flatbands. *Phys. Rev. Lett.* **134**, 103801 (2025).
